# Supplementary material for: Cross-laboratory evaluation of multiplex bead assays including independent common reference standards for immunological monitoring of observational and interventional human studies
Source: PLoS One. 2018 Sep 4;13(9):e0201205. doi: 10.1371/journal.pone.0201205 (PMC6122788; doi:10.1371/journal.pone.0201205)
Supplement: S2 File — (XLSX) [file pone.0201205.s004.xlsx]

## Sheet: lab 1- manu I lot A
		Hu IL-1b (39)	Hu IL-1ra (25)	Hu IL-2 (38)	Hu IL-5 (33)	Hu IL-8 (54)	Hu IL-10 (56)	Hu IL-13 (51)	Hu IL-17 (76)	Hu GM-CSF (34)	Hu IFN-g (21)	Hu IP-10 (48)	Hu MCP-1(MCAF) (53)	Hu MIP-1a (55)	Hu MIP-1b (18)	Hu TNF-a (36)
Type	Well	FI	FI	FI	FI	FI	FI	FI	FI	FI	FI	FI	FI	FI	FI	FI
S1	A1	17541,0	12723,5	11873,0	18974,0	9694,0	10805,0	13742,0	12920,0	17297,0	2622,0	12246,0	6781,0	14590,0	17835,5	10583,0
S1	A2	18152,0	13470,0	11651,0	19169,0	9746,0	10651,0	13246,0	13057,0	17686,0	2547,0	11812,0	6699,5	14098,5	17527,0	10461,0
S2	B1	10666,0	7848,0	3695,0	11927,0	7644,5	4398,5	2076,0	3738,0	5692,5	291,5	3104,5	5301,0	7909,0	11321,0	3601,0
S2	B2	10561,0	8564,0	3760,5	12431,0	7698,0	4217,0	2005,5	3883,5	6071,0	305,0	3223,0	5347,0	7731,0	12193,0	3768,0
S3	C1	3872,0	2135,0	611,5	2500,0	2301,0	784,0	219,0	527,0	1493,0	55,0	248,0	2277,0	1241,0	1380,0	797,0
S3	C2	3701,0	2599,0	571,0	2268,0	2192,0	739,5	202,0	476,0	1505,5	54,0	212,0	2050,5	1153,0	1196,0	734,5
S4	D1	1026,0	447,0	190,0	226,0	406,5	116,0	46,0	115,0	890,0	18,0	28,5	454,5	161,0	201,0	182,0
S4	D2	965,5	397,0	184,5	198,0	381,0	104,0	44,0	111,0	826,0	21,0	27,0	443,5	165,5	206,0	172,0
S5	E1	251,0	99,0	145,0	33,0	88,0	52,5	33,0	76,0	749,0	16,5	16,0	140,5	30,0	83,0	51,0
S5	E2	215,0	91,0	134,0	27,0	84,5	53,0	29,0	70,0	741,0	15,0	17,0	136,0	28,0	76,0	44,0
S6	F1	70,0	51,0	---	15,5	27,0	---	---	64,0	783,5	14,0	15,0	106,0	18,5	68,0	24,0
S6	F2	72,0	46,0	---	15,0	27,0	---	---	63,0	809,0	15,0	17,0	108,0	19,0	65,0	23,0
S7	G1	32,0	---	---	---	---	---	---	---	---	---	---	---	---	65,0	17,0
S7	G2	29,0	---	---	---	---	---	---	---	---	---	---	---	---	59,5	18,0
B	H1	16,0	29,0	120,0	12,0	19,0	41,0	16,5	64,0	817,0	13,0	16,0	98,0	17,0	61,0	17,0
B	H2	16,0	27,0	122,0	13,0	19,0	39,0	17,0	66,0	813,0	12,0	17,0	93,5	18,0	65,0	16,0
B	H3	16,5	26,0	115,5	11,0	19,0	38,0	16,0	59,0	773,0	13,0	13,5	89,0	18,0	58,5	15,0
B	H4	14,0	28,0	107,0	14,0	17,0	37,0	17,0	59,0	755,0	13,0	15,0	86,0	16,0	60,0	15,0
ref S1	A3	21421,5	10166,5	9575,0	14063,5	4218,0	7717,0	21866,0	11291,0	19486,5	6184,5	15181,0	3507,0	4486,5	18145,0	8537,0
ref S1	A4	21354,0	9813,0	9345,0	14006,0	4324,5	7687,0	22360,0	10996,0	19613,0	5982,0	15461,5	3431,0	4327,0	18294,5	8283,0
ref S2	B3	18192,0	3779,0	3206,5	8924,0	2621,0	2927,0	12805,5	4696,5	10481,0	604,0	7886,0	2826,0	2482,0	14267,0	3804,0
ref S2	B4	18378,0	3711,5	3217,5	9055,0	2532,0	2948,0	13412,0	4815,0	10729,5	569,5	7818,0	2884,0	2428,0	14697,0	3910,0
ref S3	C3	11934,0	1098,0	919,5	3138,0	1110,0	927,0	4994,0	1620,0	3985,0	143,5	3850,0	1172,0	750,5	7949,0	1429,0
ref S3	C4	12432,0	1052,5	890,0	2993,5	998,0	898,0	4802,0	1507,0	3620,0	136,0	3902,5	1197,0	690,0	7760,5	1320,0
ref S4	D3	5997,0	217,0	177,0	357,0	367,0	124,0	576,0	333,0	1078,0	33,5	1202,0	370,0	176,0	3181,5	482,0
ref S4	D4	5838,5	258,5	182,5	338,5	338,0	119,5	532,5	324,0	1089,0	32,0	1169,0	345,5	154,5	2990,0	488,0
ref S5	E3	2256,0	81,0	120,5	54,0	111,0	50,0	102,0	89,5	746,0	17,0	74,0	142,0	35,0	584,0	164,0
ref S5	E4	2325,0	99,0	126,0	54,0	119,0	55,0	98,0	93,0	772,0	18,0	70,0	147,0	32,0	613,0	162,0
ref S6	F3	722,0	46,0	115,0	19,0	38,0	41,0	35,0	63,0	739,0	12,0	18,0	102,0	20,0	134,0	60,5
ref S6	F4	675,0	45,0	110,0	19,0	37,0	40,0	35,5	67,0	737,0	14,0	18,0	97,5	20,0	133,0	61,0
ref S7	G3	218,0	33,0	103,0	14,0	22,0	37,0	19,0	63,0	728,0	13,0	14,0	89,5	17,0	77,0	28,0
ref S7	G4	208,0	31,0	105,0	14,0	20,0	38,0	21,0	57,0	767,5	13,0	16,0	93,0	17,0	81,0	28,0
LUMC#1	A5	1227,0	1605,5	8299,5	146,5	8262,0	156,5	3117,0	557,0	3559,0	732,0	3348,0	408,0	16593,0	17660,0	2144,0
LUMC#2	B5	75,0	4695,5	175,0	487,0	3679,0	139,5	5480,5	183,0	742,5	98,0	24205,0	1800,5	646,0	2687,0	105,0
LUMC#3	C5	1006,5	3721,0	9959,0	275,0	10550,0	1793,5	6771,0	2289,0	1254,0	382,5	23439,0	794,0	16210,0	16961,5	856,5
LUMC#4	D5	393,0	341,0	140,5	30,5	5892,5	262,0	1985,0	542,0	4291,0	1540,5	16286,5	943,5	16516,0	19007,0	97,0
LUMC#5	E5	102,0	9378,0	121,0	29,0	7086,0	63,0	429,0	161,0	728,0	42,0	16963,0	421,0	3509,0	13292,5	60,0
LUMC#6	F5	348,5	5769,0	130,0	31,0	7418,0	61,5	1874,0	659,0	1650,0	63,5	19247,0	374,0	15896,0	18978,0	445,0
spiked 1500	H5	9859,5	553,0	821,5	1920,0	397,0	752,0	4012,5	494,0	3243,0	80,0	590,0	631,0	301,0	3688,0	1033,5
spiked 500	G5	11909,0	860,0	1389,0	3073,0	637,0	1156,0	6327,0	807,0	4503,0	145,0	1071,0	945,0	470,0	5223,0	1355,0
S1	A7	21371,0	15385,0	14731,5	24159,0	10619,0	11651,5	18478,5	15757,0	22953,0	1665,0	12458,5	8014,0	19632,0	23874,0	12228,0
S1	A8	21762,0	14213,0	15060,5	24918,0	10793,0	11386,0	20099,0	16083,0	23285,0	1782,5	13187,0	8028,5	20337,0	23809,0	13053,0
S2	B7	8663,0	8122,0	3050,0	10949,0	6520,5	2922,0	1571,0	2755,0	5100,0	167,0	2017,0	5130,0	7158,0	14358,0	2440,0
S2	B8	7899,5	6848,0	2684,5	10269,5	6626,0	2678,0	1396,0	2486,5	4608,5	157,0	2045,0	4858,0	6816,0	10876,0	2119,5
S3	C7	2799,0	1915,0	470,5	1571,0	1735,0	548,0	168,0	378,0	1101,0	40,0	161,0	1631,0	895,0	946,0	545,0
S3	C8	2412,5	1779,0	385,0	1315,0	1490,5	432,0	141,0	328,5	1020,0	36,5	187,0	1557,0	1106,0	1198,0	429,0
S4	D7	531,0	281,0	120,0	105,0	233,0	71,0	37,0	89,0	573,0	17,0	25,0	276,0	102,0	149,0	102,0
S4	D8	462,0	274,0	109,0	88,5	213,0	69,0	32,5	88,5	555,5	16,0	23,0	231,0	87,0	140,0	90,0
S5	E7	119,0	67,5	93,0	21,0	57,0	36,0	25,0	58,0	482,0	13,0	14,0	91,0	21,0	66,0	32,0
S5	E8	114,0	70,0	89,0	20,0	59,0	39,0	23,0	62,0	467,0	14,0	16,0	86,0	23,0	61,0	31,5
S6	F7	46,0	34,0	70,0	14,0	24,0	33,0	19,0	52,0	439,0	13,0	15,5	64,0	17,5	50,0	22,0
S6	F8	47,0	36,0	76,0	15,0	25,0	32,0	19,0	52,0	452,0	13,0	15,5	65,5	19,0	55,0	21,0
S7	G7	22,0	26,5	81,0	12,0	20,0	32,0	17,0	56,0	492,5	14,0	14,0	65,0	16,0	54,0	17,0
S7	G8	23,0	25,0	70,0	14,0	23,0	30,0	17,0	51,5	430,5	14,0	15,0	55,0	18,0	51,0	17,0
B	H7	18,0	22,0	77,0	13,0	20,0	29,5	17,0	54,0	490,0	13,0	15,0	63,0	15,0	52,0	16,0
B	H8	15,5	26,0	74,0	13,0	20,0	34,0	16,0	52,0	448,0	15,0	14,0	58,0	17,0	50,0	16,0
B	H9	15,0	22,0	73,0	13,0	21,0	29,5	17,0	50,5	426,5	14,0	14,0	54,0	17,0	52,0	15,0
B	H10	15,0	25,0	72,0	13,0	19,0	32,0	17,0	58,0	487,0	14,0	14,0	60,0	17,0	52,5	17,0
ref S1	A9	24300,0	9545,0	10549,0	17157,0	3616,0	6555,5	26352,0	11909,0	23984,0	4087,0	15606,0	3511,0	4050,5	23983,0	8477,0
ref S1	A10	24094,5	9013,0	9733,0	16372,0	2861,5	6236,0	25720,0	12071,5	23612,0	2201,0	15558,0	3336,0	3939,0	24093,0	9361,0
ref S2	B10	19245,5	2412,5	2437,0	7123,5	1561,0	1952,5	15001,0	3794,0	9905,0	308,0	6442,0	2143,0	1591,0	16302,0	2816,0
ref S2	B9	21209,0	2810,0	2800,0	8594,0	1854,0	2334,0	17451,0	4337,0	11156,0	365,5	7486,0	2549,0	2227,5	17247,0	3229,5
ref S3	C9	12549,0	725,0	756,0	2446,0	816,0	722,0	5832,0	1421,0	3526,0	99,0	3407,0	1089,0	643,5	8321,0	1244,0
ref S3	C10	10397,0	612,0	554,0	1580,0	538,5	539,0	4362,0	1010,5	3001,0	71,0	2697,5	781,0	375,0	6749,5	830,0
ref S4	D9	4380,0	158,5	122,0	190,0	228,5	84,0	379,5	226,5	751,0	25,0	804,5	234,5	110,0	2307,0	304,0
ref S4	D10	3859,0	140,0	109,0	144,0	188,0	69,5	325,5	208,0	684,0	23,0	706,0	202,0	81,0	2038,0	265,0
ref S5	E9	1475,0	59,0	89,0	35,0	78,0	42,0	78,0	76,0	501,5	17,0	54,0	100,5	26,5	429,0	115,0
ref S5	E10	1426,0	53,0	75,0	33,0	73,0	37,5	65,5	69,5	471,0	18,0	50,0	89,0	29,0	396,5	105,0
ref S6	F9	406,0	35,0	79,0	15,0	30,0	32,0	29,0	54,0	451,0	15,5	27,0	71,0	19,0	106,0	45,0
ref S6	F10	407,5	33,0	72,0	15,0	30,0	30,0	31,0	55,0	451,0	17,0	16,0	71,0	19,0	112,5	43,0
ref S7	G9	122,0	25,0	71,0	13,0	22,0	29,0	20,0	56,0	439,5	13,0	14,5	55,0	17,0	65,5	24,0
ref S7	G10	119,5	25,0	63,5	13,0	22,5	31,0	20,0	51,0	428,0	13,5	14,0	58,0	17,0	60,0	22,0
LUMC#1	A11	761,0	808,0	8733,5	64,0	7244,0	100,0	2625,5	396,0	2790,0	342,0	2354,5	341,0	22971,5	24022,0	1298,5
LUMC#2	B11	53,0	2900,0	105,5	208,0	2385,0	77,0	5208,0	126,0	474,0	63,0	26546,5	1748,0	384,0	1666,0	66,0
LUMC#3	C11	672,0	2363,0	10978,0	138,0	10188,0	1198,0	7323,5	1633,5	965,0	192,0	25897,0	1049,0	22486,0	24133,5	564,0
LUMC#4	D11	371,0	224,5	104,5	28,0	5879,0	253,5	2608,0	495,0	3949,5	1298,0	21304,0	833,0	22285,0	24057,0	88,5
LUMC#5	E11	77,0	8128,0	80,0	18,0	6076,0	49,0	314,0	120,0	518,5	31,0	18607,0	394,0	2691,0	13589,0	39,0
LUMC#6	F11	287,0	3933,0	96,0	20,0	5716,0	46,0	1257,0	404,0	1100,0	39,0	22613,5	339,0	20844,5	23819,0	234,0
spiked 1500	H11	8568,0	339,0	616,0	1090,5	258,0	509,5	4217,0	358,0	2529,5	52,0	380,0	406,0	204,0	2984,5	697,5
spiked 500	G11	9885,5	430,0	857,0	1615,5	350,0	685,5	6193,0	506,0	3267,5	75,0	637,0	572,0	300,5	4010,5	852,0

## Sheet: lab 1- manu I lot B
		Hu IL-1b (39)	Hu IL-1ra (25)	Hu IL-2 (38)	Hu IL-5 (33)	Hu IL-8 (54)	Hu IL-10 (56)	Hu IL-13 (51)	Hu IL-17 (76)	Hu GM-CSF (34)	Hu IFN-g (21)	Hu IP-10 (48)	Hu MCP-1(MCAF) (53)	Hu MIP-1a (55)	Hu MIP-1b (18)	Hu TNF-a (36)
Type	Well	FI	FI	FI	FI	FI	FI	FI	FI	FI	FI	FI	FI	FI	FI	FI
S1	A1	16584,0	8035,0	9768,0	17421,5	7898,5	7885,5	14346,0	8181,0	15231,0	2236,0	12354,0	---	13552,5	14970,0	10770,5
S1	A2	16299,5	8134,0	9701,0	16964,0	7691,0	7839,0	14697,0	7949,0	15549,0	1963,5	11622,0	---	13037,0	15819,5	11116,0
S2	B2	10169,0	4990,0	3832,0	11266,5	5453,0	2487,5	4055,0	2048,0	6547,0	313,5	3307,0	4440,0	7620,0	9617,0	6091,5
S2	B1	10494,5	5024,0	3984,5	11573,0	5581,0	2644,0	4172,0	2165,0	6617,0	351,5	3424,5	4746,0	8016,0	9121,0	6070,5
S3	C1	3941,0	1999,0	875,0	2954,0	2109,0	452,5	687,5	361,5	1492,5	80,5	411,0	3465,0	1832,0	1494,0	1629,0
S3	C2	3526,0	1869,0	808,0	2577,5	2045,0	396,5	621,0	336,0	1479,0	72,0	412,0	3104,0	1791,0	1542,0	1417,5
S4	D1	953,0	499,5	342,0	258,0	424,0	87,0	180,0	115,0	586,0	28,0	61,0	1039,5	295,0	238,0	344,0
S4	D2	841,0	398,0	313,0	207,0	345,0	76,0	135,5	99,0	574,0	30,0	62,0	925,5	294,0	220,0	289,0
S5	E1	229,0	102,0	221,0	20,0	49,0	40,0	51,0	71,0	402,5	23,0	43,0	190,5	29,0	63,0	70,5
S5	E2	210,0	88,0	202,5	19,0	45,0	40,5	47,0	70,0	404,5	21,0	43,0	179,0	26,0	61,0	65,0
S6	F1	---	---	---	---	---	33,5	---	---	---	---	---	---	---	---	---
S6	F2	60,0	33,0	188,0	13,5	20,0	34,0	22,0	64,0	367,0	20,0	39,0	87,0	17,5	51,0	23,0
S7	G1	---	---	---	---	***	***	***	---	***	---	---	***	***	---	---
S7	G2	24,0	24,0	---	---	---	32,0	---	---	---	---	---	77,0	18,0	---	---
B	H1	13,5	19,0	181,5	11,0	17,0	32,0	18,0	63,0	358,0	21,0	42,0	76,0	19,0	48,0	16,0
B	H2	19,0	21,0	179,0	13,0	16,0	33,0	19,0	65,5	378,0	21,0	41,5	80,0	17,0	51,0	15,0
B	H3	16,0	18,0	168,0	12,0	17,0	30,0	20,0	63,0	379,0	20,0	40,0	75,0	17,0	50,0	16,0
B	H4	15,0	17,0	155,0	11,0	15,0	28,0	16,0	58,0	340,0	18,0	38,5	71,0	16,0	47,0	15,0
ref S1	A3	20299,0	5096,0	8449,0	12619,0	3773,0	6406,0	22266,5	6966,0	18599,0	6143,0	15835,0	3117,0	4437,0	17842,0	8697,5
ref S1	A4	20373,0	5121,0	8638,0	12636,5	3712,0	6244,0	22492,0	6807,5	19355,0	5780,5	15155,0	3098,0	4454,0	18271,5	8694,5
ref S2	B3	17779,5	1698,0	4386,0	8395,0	2034,0	3147,0	15765,0	2611,0	10495,0	1256,0	7687,0	2614,0	2411,0	14284,5	3993,0
ref S2	B4	18196,5	1685,0	4545,0	8965,0	2199,0	3316,5	15972,5	2843,0	10381,5	1318,0	8144,5	2749,5	2487,0	14501,0	4059,0
ref S3	C3	11527,0	510,0	1154,0	3115,5	783,0	988,0	5703,5	761,0	3608,0	212,0	2939,5	1124,0	672,0	7685,5	1393,0
ref S3	C4	12071,0	526,0	1188,0	3242,5	803,0	1068,0	5771,0	800,0	3738,0	230,5	3188,0	1182,5	705,5	8024,0	1471,5
ref S4	D3	6160,0	192,0	358,0	787,0	286,0	287,5	1323,0	235,0	1059,0	63,0	769,0	384,5	178,5	3155,0	558,5
ref S4	D4	5722,5	170,0	332,0	674,5	281,5	249,0	1291,0	220,0	1017,0	57,0	706,5	314,0	167,0	2960,0	479,0
ref S5	E3	2173,0	64,0	187,0	98,0	72,0	71,0	291,0	99,0	451,0	26,0	89,0	123,0	45,0	640,5	163,0
ref S5	E4	2082,0	63,0	187,5	93,0	81,5	67,0	269,0	93,0	446,5	29,0	88,0	115,0	44,0	609,5	158,0
ref S6	F3	701,0	33,0	160,0	24,0	30,0	37,5	78,0	71,5	365,0	21,0	49,0	80,0	23,0	188,0	57,0
ref S6	F4	649,0	33,0	159,0	25,0	29,0	36,0	76,0	64,0	361,0	22,0	47,5	76,5	24,0	184,5	58,0
ref S7	G4	274,0	22,5	166,0	12,0	19,0	31,0	35,0	59,0	373,0	21,0	38,0	77,0	20,0	79,0	30,0
ref S7	G3	239,0	22,5	157,5	13,5	17,0	29,0	30,0	59,0	356,0	21,0	39,5	76,5	19,0	73,0	29,5
LUMC#1	A5	1050,0	706,0	7608,0	137,0	6945,0	119,0	2912,0	571,0	3001,0	529,0	2781,0	330,0	15052,5	18068,0	1576,5
LUMC#2	B5	85,5	1995,0	229,0	461,5	3158,0	105,0	5099,0	196,5	394,0	111,0	23346,0	1488,0	655,0	2756,0	140,0
LUMC#3	C5	1043,0	1737,0	9201,0	288,0	8831,0	1458,0	6562,0	1367,0	1041,0	370,0	22244,0	761,0	15441,0	17228,0	806,0
LUMC#4	D5	366,0	191,0	173,0	32,0	5602,0	188,0	2124,5	476,0	3526,0	1315,0	14396,0	715,0	14867,0	18675,0	88,5
LUMC#5	E5	98,0	4554,5	180,0	31,0	4946,0	49,0	670,0	232,5	445,5	46,0	14354,5	470,5	3264,0	13790,0	70,0
LUMC#6	F5	380,0	2894,0	204,0	38,0	6630,0	72,5	1839,0	551,5	1095,0	91,0	18680,0	503,5	14618,0	18750,0	407,0
spiked 1500	H5	13918,5	700,0	2394,0	5034,0	829,5	1638,0	9890,0	858,0	5881,0	243,0	1876,0	1562,0	987,0	8223,0	2255,0
spiked 500	G5	7544,0	214,0	552,5	1047,5	215,0	362,0	2663,0	223,0	1738,0	59,5	185,0	402,0	210,0	2650,5	712,0
S1	A7	18062,0	8451,0	10898,0	22162,0	7801,0	6600,0	20086,0	7644,0	20469,0	1182,0	11903,0	5617,0	17115,5	22908,0	12610,0
S1	A8	17934,0	8443,0	10930,0	22371,0	7980,5	6444,0	21114,0	7573,0	22088,0	1145,0	11003,5	5612,0	17013,0	23113,5	12797,5
S2	B7	8887,0	4665,5	3468,0	10582,0	5176,0	1774,0	4324,0	1612,5	6237,0	195,0	2485,0	4084,5	7703,0	9297,0	5028,0
S2	B8	8954,0	4918,0	3584,0	10598,0	5033,0	1790,0	4236,0	1610,0	6569,5	197,0	2381,5	4327,0	7802,0	9453,0	5271,0
S3	C7	2435,5	1449,5	579,0	1689,0	1548,0	253,0	490,0	253,0	1107,0	50,0	296,0	2527,0	1197,0	1029,5	979,5
S3	C8	2459,5	1391,0	570,5	1784,0	1527,5	252,0	462,5	255,0	1096,0	48,0	306,0	2562,5	1431,5	1234,5	1049,0
S4	D7	499,5	308,0	216,0	123,0	276,5	54,5	116,0	84,0	388,0	23,0	76,0	644,0	211,0	186,0	207,0
S4	D8	560,0	254,0	232,0	134,0	277,5	60,0	121,0	89,0	417,0	24,5	74,0	725,0	228,0	165,5	216,0
S5	E7	136,0	77,0	166,0	20,0	39,0	32,0	41,5	63,0	296,0	21,0	59,0	128,0	22,0	53,5	51,0
S5	E8	121,0	70,0	156,0	17,0	38,0	32,0	39,0	61,0	279,0	20,0	63,0	117,0	26,0	54,0	50,0
S6	F7	38,0	26,0	127,0	13,0	19,0	28,5	21,0	57,0	248,0	19,0	58,0	61,0	16,0	44,0	23,0
S6	F8	38,0	28,0	129,0	10,0	19,0	28,5	23,0	57,0	256,0	18,0	61,0	69,0	18,5	45,0	20,0
S7	G7	18,0	19,0	115,0	11,0	17,0	23,5	20,0	59,0	232,0	21,0	57,0	52,0	16,5	41,0	16,0
S7	G8	18,5	21,5	119,0	12,0	16,5	26,0	19,0	56,0	238,0	18,0	60,5	55,0	16,0	46,0	17,0
B	H7	19,0	17,0	120,0	12,0	17,5	27,5	17,0	57,0	228,0	20,0	52,0	52,0	16,0	42,0	18,5
B	H8	14,0	19,5	119,0	12,0	15,0	25,0	18,0	58,0	242,0	20,0	59,0	51,0	17,5	43,5	17,0
B	H9	13,0	18,0	100,0	12,0	17,5	25,0	18,0	50,0	208,0	18,0	58,5	45,0	17,0	44,0	14,0
B	H10	16,0	16,0	101,0	10,0	15,5	23,0	16,0	51,0	200,0	17,0	58,0	46,0	17,0	40,0	16,0
ref S1	A9	22772,5	4834,0	9323,5	12945,0	3161,0	5304,5	24501,0	6397,0	23572,5	4034,0	15067,0	2518,0	4075,0	23643,0	8847,0
ref S1	A10	23354,5	4863,0	9805,5	14494,0	3124,0	5628,0	24587,5	6942,5	23474,0	4460,0	16541,0	3017,5	4364,0	23647,0	9036,0
ref S2	B9	17485,0	1322,0	3955,0	6970,0	1606,0	2160,0	20392,0	1997,0	11006,0	708,5	6764,0	1923,0	1957,0	17330,0	3016,0
ref S2	B10	17932,5	1328,0	3930,0	7348,5	1544,5	2259,0	20746,5	2104,0	11444,5	669,0	6426,0	2040,5	2011,5	17616,0	3157,0
ref S3	C9	10364,0	381,5	912,0	2055,0	583,0	662,5	6126,0	562,0	3154,5	127,0	2230,0	836,0	530,0	7418,0	1026,0
ref S3	C10	10690,0	347,0	856,0	2184,0	574,5	687,5	6390,0	554,0	3160,5	130,0	2462,0	836,0	549,0	7599,5	1047,0
ref S4	D9	4223,5	119,5	221,0	381,5	171,0	158,0	1099,5	159,5	726,0	39,0	488,5	220,0	117,0	2301,0	327,0
ref S4	D10	4696,0	123,0	247,0	452,5	177,0	173,0	1152,5	179,5	816,0	44,0	530,5	250,5	131,0	2472,5	359,0
ref S5	E9	1528,0	51,5	142,0	70,0	61,0	54,0	225,0	86,0	330,5	24,0	94,5	99,0	32,0	458,0	126,0
ref S5	E10	1429,0	52,0	139,5	59,0	55,5	50,0	220,5	83,0	310,0	26,0	92,5	93,5	37,0	453,0	116,0
ref S6	F9	463,0	32,0	126,0	20,0	27,0	35,0	69,0	65,0	268,0	21,0	67,0	70,0	23,0	136,0	48,0
ref S6	F10	462,0	26,0	121,0	19,0	29,0	34,0	67,5	63,0	246,0	19,0	63,5	61,5	21,0	138,0	49,0
ref S7	G9	120,0	19,0	99,0	15,0	19,0	25,0	28,0	55,0	226,0	19,0	61,0	47,0	17,0	57,5	25,5
ref S7	G10	119,0	21,0	100,0	13,0	20,5	21,0	25,0	50,0	207,5	19,0	58,0	49,0	17,0	57,0	23,5
LUMC#1	A11	747,0	520,0	7755,0	78,0	6321,5	84,0	2934,0	425,0	2726,5	287,0	2163,5	313,0	18755,5	23613,0	1226,0
LUMC#2	B11	66,0	1560,0	175,0	292,5	2394,0	82,0	5597,5	175,0	298,0	75,5	24120,0	1564,0	526,0	2091,0	107,0
LUMC#3	C11	702,5	1269,0	9675,0	173,0	8388,5	1021,0	7484,0	1002,0	801,0	207,0	24073,5	800,0	19513,0	23578,0	570,0
LUMC#4	D11	303,0	154,0	134,0	24,0	4286,5	152,5	1978,0	378,0	2968,0	880,0	16487,0	724,5	19674,5	23451,5	68,0
LUMC#5	E11	74,0	3932,0	131,0	19,0	4131,0	37,0	533,0	179,0	287,0	34,5	15143,0	353,0	2735,5	14953,0	50,0
LUMC#6	F11	296,0	2270,0	138,0	27,0	5695,0	48,0	1626,0	400,0	778,0	65,0	20894,0	370,0	17498,0	23671,5	279,0
spiked 1500	H11	11235,0	451,0	1721,5	2635,5	541,0	867,0	10973,0	464,5	5243,0	118,0	1278,0	815,5	588,0	7740,0	1331,5
spiked 500	G11	5767,0	118,0	371,0	517,0	136,0	203,0	2277,5	158,0	1099,0	39,0	137,0	239,5	139,5	1799,0	436,0

## Sheet: lab 1- manu I lot C
		Hu IL-1b (39)	Hu IL-1ra (25)	Hu IL-2 (38)	Hu IL-5 (33)	Hu IL-8 (54)	Hu IL-10 (56)	Hu IL-13 (51)	Hu IL-17 (76)	Hu GM-CSF (34)	Hu IFN-g (21)	Hu IP-10 (48)	Hu MCP-1(MCAF) (53)	Hu MIP-1a (55)	Hu MIP-1b (18)	Hu TNF-a (36)
Type	Well	FI	FI	FI	FI	FI	FI	FI	FI	FI	FI	FI	FI	FI	FI	FI
S1	A1	15520,0	6899,0	10125,5	17490,0	5983,0	9187,0	10150,0	9398,0	13012,0	1523,5	8483,0	---	12203,0	14233,0	9848,0
S1	A2	15628,0	6560,0	9891,0	16972,0	5968,0	8914,0	10259,0	9377,0	12673,0	1583,5	8836,0	---	11651,0	13380,0	9612,0
S2	B1	8609,5	3599,0	2924,0	11139,5	4055,0	4035,0	2490,0	2150,0	5943,0	327,5	1805,0	4631,0	6349,0	8019,5	4329,5
S2	B2	9528,0	3608,0	3219,0	12134,0	4314,5	4429,5	2868,0	2462,0	6216,0	374,0	2023,0	4683,5	6861,5	8687,0	4816,0
S3	C1	3781,0	1173,0	616,0	4016,5	2259,5	1068,5	408,0	502,5	1856,0	83,0	294,0	3613,0	2163,0	2192,0	1333,0
S3	C2	3592,0	1156,0	610,0	3663,0	2035,0	1006,5	388,0	460,5	1844,0	80,5	262,0	3457,0	2113,0	2077,0	1218,0
S4	D1	972,0	302,0	250,0	600,0	594,0	220,0	97,0	136,0	1137,0	26,0	45,5	1020,0	391,0	384,0	286,0
S4	D2	974,0	298,5	243,5	550,0	515,0	218,0	96,5	132,0	1115,5	24,0	44,0	1010,0	370,5	391,0	264,0
S5	E1	238,5	84,0	175,0	69,0	90,0	49,0	40,0	76,0	981,0	13,0	23,0	220,0	44,5	85,0	65,0
S5	E2	228,0	56,0	157,0	69,0	88,0	38,0	40,0	71,0	822,0	15,0	21,0	178,0	41,0	75,0	59,0
S6	F1	57,5	30,0	155,0	17,0	26,0	36,0	23,0	64,5	922,5	11,0	19,0	120,5	21,0	58,0	20,0
S6	F2	64,5	29,5	158,0	20,0	29,0	37,0	25,0	69,0	901,0	12,0	20,0	130,0	23,0	53,0	22,0
S7	G1	27,0	23,0	---	---	---	---	21,0	---	---	---	---	---	---	52,0	13,0
S7	G2	27,0	23,0	---	---	---	---	20,0	---	---	---	---	---	---	51,0	14,0
B	H1	15,0	20,0	172,0	12,0	16,0	37,5	18,0	66,0	929,0	10,0	19,0	107,0	21,0	57,0	11,0
B	H2	15,0	17,0	145,5	11,0	12,0	32,5	18,0	55,0	867,0	13,0	18,0	87,5	20,0	47,0	11,0
B	H3	14,0	15,0	141,0	11,0	13,5	33,0	19,0	59,0	885,0	10,5	18,0	91,0	18,0	46,0	10,0
B	H4	15,0	18,0	142,0	12,5	14,0	34,0	19,0	55,0	906,0	12,0	18,0	87,5	19,0	51,0	11,0
ref S1	A3	18760,0	3520,0	9678,0	12109,0	2855,0	5431,0	20114,0	8276,0	16412,0	4289,5	13233,0	3671,5	3312,0	16331,0	6963,0
ref S1	A4	19235,0	4016,0	10312,0	12634,0	3212,0	6140,0	20092,0	9257,0	16733,5	5323,0	15021,0	3953,5	3869,0	16063,5	7957,0
ref S2	B3	15842,0	1089,0	4364,0	7969,0	1598,0	2417,5	13224,0	3545,0	9059,0	1103,0	7096,0	2684,0	1930,0	12605,0	3114,0
ref S2	B4	16867,0	1146,5	4373,5	8596,0	1732,0	2709,0	13650,0	3862,0	8921,0	1155,0	7394,0	3014,0	2022,5	13007,0	3465,5
ref S3	C3	9728,5	340,0	937,0	2643,0	646,0	700,0	3865,0	996,0	3121,0	192,0	3009,0	1038,0	475,0	6087,0	1026,0
ref S3	C4	10039,0	358,0	924,5	2875,5	565,0	758,0	4122,0	1087,5	3334,5	191,0	3088,5	1100,0	512,5	6163,0	1095,0
ref S4	D3	5269,5	120,0	252,0	659,0	253,5	186,0	784,0	294,0	1335,5	48,0	665,5	376,0	148,0	2512,5	450,5
ref S4	D4	4703,5	112,0	227,5	469,0	245,0	134,0	666,5	240,0	1200,5	35,0	590,0	272,5	118,0	2407,0	352,0
ref S5	E3	1757,0	43,0	152,0	82,0	78,0	51,0	117,0	104,5	913,5	18,0	42,0	153,5	41,0	752,5	124,0
ref S5	E4	1754,5	45,0	162,0	74,0	70,0	49,0	112,5	106,0	934,5	17,0	44,0	163,0	40,0	706,0	129,0
ref S6	F3	655,0	27,5	138,5	29,0	26,5	34,5	33,0	66,0	860,0	11,0	18,5	112,0	24,0	134,0	48,5
ref S6	F4	699,5	25,0	134,0	25,0	30,0	31,0	34,0	62,0	837,0	11,0	20,0	112,0	23,0	130,0	47,0
ref S7	G3	234,0	20,0	144,0	13,0	15,0	35,0	25,5	59,0	899,0	12,0	19,0	104,0	21,0	66,0	22,0
ref S7	G4	218,0	20,0	155,0	14,0	18,0	35,0	23,0	63,0	893,0	11,0	20,0	107,0	19,0	57,0	22,0
LUMC#1	A5	1367,0	477,0	9604,0	146,0	5211,0	116,5	2389,0	613,0	2683,0	569,5	2596,0	465,0	14319,0	14412,0	1405,0
LUMC#2	B5	109,5	1355,0	236,5	531,0	2581,0	93,5	4578,5	196,0	831,0	129,0	23225,0	1835,0	639,0	2330,5	130,0
LUMC#3	C5	1297,0	1140,5	11231,0	298,0	6724,0	1192,5	5713,0	1812,5	1221,0	399,0	22016,0	837,0	13952,5	15355,0	716,0
LUMC#4	D5	816,0	184,0	201,0	35,0	4424,5	185,0	2071,5	614,5	3442,5	1586,0	14598,0	1059,0	14342,0	16507,0	119,0
LUMC#5	E5	173,0	3110,5	170,5	33,0	3700,0	49,0	650,0	238,5	832,5	45,0	13086,0	588,0	2721,5	11487,5	58,0
LUMC#6	F5	954,5	2222,5	228,0	81,0	5614,0	88,0	2295,0	736,5	1502,0	135,0	19597,5	858,5	13867,0	16150,0	480,0
spiked 1500	H5	12081,0	532,0	2460,0	4770,0	769,0	1395,0	8685,5	1260,0	5047,0	245,0	2199,0	1455,0	633,0	6456,0	1738,0
spiked 500	G5	6650,0	184,5	599,5	1204,0	195,0	360,5	2549,0	332,0	2032,0	50,5	243,0	429,5	161,0	1898,0	632,0
S1	A7	21972,0	8532,0	15558,0	24193,0	6856,0	11293,0	16923,0	13746,0	19261,0	1354,5	11512,0	7294,0	20001,0	22913,0	14827,0
S1	A8	21450,0	8586,0	15075,5	23743,0	6967,0	10860,0	16898,5	13512,5	19094,0	1200,0	11385,5	7007,0	20077,0	22972,5	14798,5
S2	B7	10390,0	3943,0	3421,0	14831,0	4496,0	4381,5	3522,0	2328,5	7330,0	268,0	1894,0	5597,0	8345,0	10646,0	5366,0
S2	B8	10969,0	4039,5	3361,0	15430,0	4346,5	4620,5	3721,0	2413,0	7439,0	281,0	1989,5	5915,5	9053,0	10512,0	6010,0
S3	C7	3176,0	1025,0	525,0	3399,5	1696,0	894,5	368,0	436,0	1775,0	60,0	212,0	3799,0	2093,0	1909,0	1077,0
S3	C8	3282,0	988,5	527,5	3712,0	1818,5	856,5	373,0	442,0	1737,0	64,0	242,5	3992,0	2255,0	2003,0	1176,0
S4	D7	715,0	239,0	205,0	438,0	398,0	181,0	84,0	123,0	937,0	24,0	38,0	891,0	353,5	324,0	245,5
S4	D8	716,0	237,0	201,0	431,0	433,0	172,0	87,0	122,0	935,0	23,0	40,0	907,0	345,0	319,0	242,0
S5	E7	176,5	67,0	142,0	49,0	73,0	40,0	40,0	72,0	720,0	14,0	21,0	191,0	41,5	71,0	55,0
S5	E8	185,5	66,0	146,0	52,0	76,0	40,0	37,0	75,0	754,0	13,0	23,5	203,0	43,5	76,0	66,0
S6	F7	51,0	29,0	132,0	19,0	25,5	31,0	24,0	65,5	685,0	13,0	20,0	101,5	24,0	51,0	23,5
S6	F8	55,0	29,0	134,0	19,0	28,0	37,0	24,0	67,0	712,0	13,0	21,0	104,5	23,0	53,0	23,5
S7	G7	23,0	22,0	135,0	14,0	19,5	33,0	21,0	69,0	728,0	15,0	19,0	88,0	25,0	48,0	17,0
S7	G8	23,0	21,0	127,0	14,0	20,0	33,0	22,0	62,5	684,5	14,0	20,0	83,5	23,0	49,0	12,0
B	H7	16,5	21,0	134,0	12,0	17,0	31,0	20,0	66,5	723,0	12,0	19,5	81,0	21,0	49,5	12,0
B	H8	17,0	21,0	126,0	13,0	19,0	34,0	20,0	64,0	713,0	13,5	17,0	79,5	21,0	54,0	13,0
B	H9	18,0	18,0	124,0	13,0	19,0	31,0	20,0	66,0	695,0	16,0	20,5	81,0	22,0	50,0	14,0
B	H10	18,0	19,5	128,0	12,5	17,0	30,0	20,0	64,0	647,0	13,0	20,0	78,0	19,0	49,0	12,0
ref S1	A9	23837,0	4299,5	13792,0	16671,0	3032,0	6176,0	24051,0	11610,0	23325,5	4503,0	17980,0	4574,0	4140,0	23530,0	9521,0
ref S1	A10	23647,5	4141,5	14665,0	17088,0	3068,5	6440,0	24537,0	12154,0	23537,0	4856,0	19698,0	4206,5	4350,0	23818,0	10009,0
ref S2	B9	20899,0	987,0	4786,0	10347,0	1336,0	2481,0	20277,0	4160,0	10758,5	837,0	8410,0	3311,5	2222,0	17030,5	3598,5
ref S2	B10	20804,0	975,0	4760,0	9691,0	1442,0	2478,0	20227,0	3975,0	10567,0	778,0	8240,0	3257,0	2130,0	17125,0	3444,0
ref S3	C9	12500,0	285,0	909,0	2980,0	600,0	730,0	5658,0	1158,5	3390,0	152,0	3320,5	1240,0	609,0	7398,5	1255,0
ref S3	C10	12945,0	296,0	951,5	3121,0	569,5	781,5	5882,0	1275,0	3573,5	161,0	3448,0	1356,0	655,0	7634,0	1317,5
ref S4	D9	5204,0	92,0	214,5	490,5	192,5	149,0	737,0	259,0	1149,0	38,0	647,0	359,0	137,0	2301,0	405,0
ref S4	D10	4960,5	98,0	232,0	441,5	186,0	148,5	706,0	261,5	1192,5	33,5	583,5	357,5	135,0	2261,5	371,0
ref S5	E9	1700,5	42,0	134,0	71,0	69,0	44,0	114,0	115,0	698,5	19,0	45,0	155,0	44,0	706,5	129,0
ref S5	E10	1720,0	40,0	122,0	69,0	67,5	45,0	116,0	112,5	654,0	17,0	47,0	151,0	45,0	723,0	129,5
ref S6	F9	532,0	26,0	121,0	24,0	30,0	33,0	37,0	74,0	696,5	15,0	20,0	113,0	24,5	132,0	50,5
ref S6	F10	580,0	27,0	128,0	24,0	31,0	33,0	37,0	78,0	680,0	14,0	20,0	120,5	24,0	138,5	52,0
ref S7	G9	159,0	20,0	118,0	11,0	20,0	29,0	22,5	63,5	622,5	14,0	19,0	76,0	23,0	60,0	20,0
ref S7	G10	155,0	22,0	124,0	14,5	19,5	29,5	24,0	63,0	670,5	12,0	19,0	83,5	22,0	60,0	22,0
LUMC#1	A11	1622,0	499,0	14925,0	149,0	5525,5	129,0	3890,5	618,0	3373,0	543,0	2899,5	668,0	22847,0	23613,0	2009,0
LUMC#2	B11	101,0	1284,0	205,0	440,0	2190,5	88,0	6287,0	185,0	683,5	94,5	24284,0	2228,0	685,0	2266,0	118,0
LUMC#3	C11	1305,0	1182,0	17398,0	287,0	7272,0	1254,5	8665,0	1968,0	1287,0	335,0	24279,0	1277,0	21986,0	23549,0	855,0
LUMC#4	D11	842,0	152,5	185,5	33,0	3883,5	164,0	2387,0	549,5	3461,0	1187,0	18910,0	1190,5	22086,0	23765,0	109,0
LUMC#5	E11	170,0	3319,0	141,5	22,0	3292,0	44,0	641,0	198,0	641,5	30,0	16071,5	488,5	3183,0	15803,0	48,5
LUMC#6	F11	928,0	2057,0	189,0	57,0	5505,0	66,0	2550,0	671,0	1269,0	104,0	24068,0	888,0	21600,5	23613,0	439,0
spiked 1500	H11	15171,0	443,0	2463,0	5060,5	624,0	1314,5	13444,0	1292,0	5785,0	199,0	2288,5	1600,5	736,0	7599,0	1882,0
spiked 500	G11	6902,0	116,0	388,5	649,5	137,0	241,0	2162,0	248,0	1532,0	34,5	159,0	349,0	145,0	2037,0	549,5

## Sheet: lab 1- manu II lot A 
		MCP-1/CCL2 (51)	MIP-1A (12)	MIP-1B (47)	IP-10 (22)	GM-CSF (44)	IL-1ALPHA (62)	IL-1BETA (18)	IL-10 (28)	IL-13 (35)	IL-17 (36)	IL-1RA (38)	IL-5 (21)	IL-8 (27)	TNF-A (45)	IFN-G (43)	IL-2 (19)	IL-18 (66)
Type	Well	FI	FI	FI	FI	FI	FI	FI	FI	FI	FI	FI	FI	FI	FI	FI	FI	FI
S1	A1	***	***	***	***	***	***	***	***	***	***	***	***	***	***	***	***	***
S1	A2	16863,5	11442,0	14702,0	---	15735,0	8731,0	3889,5	14510,0	12079,5	14518,5	---	4790,0	6761,5	9543,0	12659,0	10833,0	16531,5
S2	B1	10798,0	8223,0	10174,0	11823,0	8239,5	5099,5	2272,0	6609,5	5509,0	5794,0	11403,5	4166,5	3374,5	4800,0	7514,0	6660,0	8313,0
S2	B2	11621,0	8726,0	11204,5	9651,0	8497,0	5221,5	2213,5	7536,5	5560,0	7827,0	11801,5	3671,0	4019,0	5244,5	8909,0	6390,5	9285,5
S3	C1	4630,5	3857,0	3944,0	4279,0	889,0	1964,0	847,5	1432,5	488,0	807,5	3038,5	1274,0	1580,0	1268,0	2352,0	642,0	3009,0
S3	C2	4455,0	4130,0	3850,0	3311,5	1049,5	2123,0	856,0	1618,0	543,0	1001,5	3312,0	1351,0	1647,5	1400,5	2800,5	687,0	4113,0
S4	D1	1347,0	972,0	949,5	504,0	172,0	699,0	309,0	392,5	97,0	86,0	433,0	429,0	528,0	429,0	732,0	102,5	1293,0
S4	D2	1269,5	854,0	698,0	372,5	138,0	479,0	235,5	304,0	83,5	85,5	363,0	352,0	439,0	320,0	546,5	76,5	790,5
S5	E1	258,0	248,0	208,0	56,0	49,5	265,5	89,5	263,0	38,0	22,0	73,0	156,5	198,5	93,0	176,5	36,0	207,0
S5	E2	295,0	256,0	207,0	68,0	49,5	248,0	108,5	213,0	43,5	24,0	77,0	152,0	208,0	126,0	228,0	38,0	318,5
S6	F1	89,0	134,0	103,0	24,0	38,0	162,0	48,5	187,0	31,0	18,0	37,0	109,5	133,5	36,0	73,0	30,0	80,0
S6	F2	86,0	124,0	111,5	26,0	36,5	159,0	63,0	184,0	29,0	15,0	36,0	96,5	131,0	44,0	84,0	32,0	106,0
S7	G1	44,0	---	---	20,0	---	---	---	290,0	---	---	---	---	131,0	31,0	63,0	---	52,0
S7	G2	42,0	---	---	15,0	---	---	---	216,0	---	---	---	---	111,5	20,0	53,5	---	49,5
B	H1	25,0	***	86,0	***	***	184,0	***	220,0	21,0	19,0	***	74,0	110,0	13,0	55,0	***	725,0
B	H2	33,0	98,0	77,0	15,0	35,5	***	32,0	200,5	29,5	16,0	22,0	103,0	***	27,0	49,0	38,0	51,0
B	H3	146,5	79,0	49,0	15,5	29,5	228,5	140,5	181,5	40,5	23,0	15,5	111,0	150,0	18,0	47,0	26,0	101,5
B	H4	1030,0	101,5	82,0	17,0	42,0	232,0	***	***	***	***	***	***	***	22,0	***	***	112,0
ref S1	A3	21302,0	5890,5	15495,0	13548,0	16201,0	8116,0	6924,0	20932,5	18647,0	17150,0	12916,5	3274,0	7081,0	6764,0	11562,0	7025,0	18793,0
ref S1	A4	19195,0	4957,0	13633,0	10235,5	14654,0	6933,0	6480,0	18411,5	17101,5	14103,0	11974,0	2725,0	6218,0	5204,0	9977,0	6379,0	15699,0
ref S2	B3	18650,0	2345,5	10581,0	6123,5	6651,5	6674,5	4364,0	9636,0	10891,0	6505,0	7117,0	1826,0	3195,0	2323,0	5691,0	1775,0	9478,0
ref S2	B4	19031,0	2422,0	11179,0	6475,5	7830,0	6216,0	4382,0	9978,0	11525,0	7819,0	7758,5	1757,5	3372,5	2385,5	5792,0	1614,0	10888,0
ref S3	C3	12822,0	1281,0	2318,0	2218,0	2570,0	4108,0	2456,0	3541,0	4505,0	1777,0	2385,5	841,0	1602,0	786,0	2659,5	247,5	5365,0
ref S3	C4	12149,5	1418,0	3479,5	2482,0	2411,0	4114,5	2486,5	4096,5	4689,0	1889,5	2412,0	813,0	1527,0	830,5	3085,0	262,5	5861,0
ref S4	D3	5155,0	658,0	659,5	394,0	435,0	1814,0	1199,0	692,0	788,0	219,0	538,0	268,0	765,0	328,0	1008,5	44,5	1691,0
ref S4	D4	5758,5	687,0	819,0	377,0	404,5	1910,0	1157,5	851,5	801,0	188,0	460,5	221,5	772,5	296,0	1163,0	49,0	2170,0
ref S5	E3	2492,0	277,5	210,5	48,5	63,0	759,0	401,0	252,0	179,0	49,0	85,5	128,0	283,0	106,0	364,0	30,0	639,0
ref S5	E4	3382,0	309,0	234,5	56,0	62,0	812,5	539,0	242,0	165,0	40,0	104,0	141,5	307,0	97,5	424,0	31,0	698,0
ref S6	F3	845,0	159,0	133,0	25,0	42,0	355,0	189,5	203,5	71,0	19,0	39,0	103,0	175,5	49,0	171,0	28,0	296,0
ref S6	F4	697,5	154,0	130,0	25,0	38,5	382,5	177,0	201,0	65,0	18,0	38,5	89,5	167,0	48,0	145,0	32,0	258,5
ref S7	G3	152,0	94,0	94,0	19,0	31,0	180,0	85,0	185,0	34,0	15,0	25,0	91,5	123,0	23,0	68,0	31,0	74,0
ref S7	G4	1695,5	142,0	117,0	21,0	***	238,5	192,0	267,0	64,0	10,0	41,0	112,5	188,0	44,0	178,5	20,0	143,0
LUMC#1	A5	3986,0	5214,0	8136,0	778,0	489,0	49,5	189,0	208,0	1289,0	225,0	389,0	23,0	2649,5	100,0	606,0	1774,0	58,5
LUMC#2	B5	8830,0	524,0	340,0	8020,0	23,0	106,0	33,0	188,5	3121,0	66,0	6539,0	40,0	1920,5	18,5	141,5	17,5	50,0
LUMC#3	C5	8687,0	6138,0	9097,0	6842,0	130,0	260,0	142,0	2775,5	3797,0	1736,5	5125,0	33,5	1619,0	64,0	445,0	1673,0	75,5
LUMC#4	D5	7162,5	5969,0	9548,0	3917,0	837,0	134,0	58,0	375,0	927,5	254,0	3306,5	19,0	2368,5	26,0	1297,0	14,0	91,0
LUMC#5	E5	4161,0	1325,5	2792,0	3675,5	23,0	62,0	33,0	45,0	333,5	21,0	2451,0	20,0	1917,5	11,0	26,0	15,0	21,0
LUMC#6	F5	6043,0	4762,5	7180,5	5522,0	101,5	120,5	67,5	92,5	1421,0	472,5	4392,0	21,0	1870,0	23,0	89,0	15,0	31,5
spiked 1500	H5	5356,0	325,0	1018,5	266,0	1566,0	1532,5	2251,0	2904,0	5308,0	1036,0	441,0	258,5	320,0	252,0	1038,0	157,0	1621,5
spiked 500	G5	1563,0	125,0	97,0	17,0	203,0	570,0	1080,0	625,0	1344,0	160,5	55,0	66,0	95,0	77,0	319,0	23,0	472,5
S1	A7	9328,0	5289,0	6302,0	6010,5	7739,5	4507,0	2698,0	7727,0	12751,0	11786,0	5651,0	3222,0	1647,0	2339,0	4486,0	2671,0	7614,0
S1	A8	7469,0	4737,0	5413,5	5765,0	7386,0	4369,5	2551,5	8520,0	13414,0	11109,5	5486,5	3024,5	1531,5	2296,5	4093,5	2547,0	6537,0
S2	B7	3151,0	3017,0	2069,0	2167,0	2407,0	1341,0	943,5	1847,0	2186,0	1629,0	2601,0	1929,0	509,0	925,0	1484,0	723,0	2479,0
S2	B8	2778,5	3234,0	2814,0	2681,5	2485,0	1455,0	1200,0	2174,5	2871,0	1855,0	3084,0	1749,5	688,0	830,0	1787,0	889,0	2712,0
S3	C7	656,0	703,0	519,0	561,0	118,0	368,0	394,0	236,0	133,0	194,5	573,5	308,5	227,5	253,0	317,0	48,0	541,0
S3	C8	753,0	813,0	481,5	558,5	113,0	328,5	400,0	246,5	132,0	198,0	599,5	307,0	203,0	268,5	401,5	49,0	536,0
S4	D7	170,5	144,0	93,0	93,5	22,0	102,5	127,0	44,0	23,0	20,0	54,5	76,5	64,0	72,5	113,0	14,0	151,0
S4	D8	195,0	167,5	99,0	122,0	29,0	121,0	126,5	47,0	27,0	18,0	62,0	73,0	70,5	75,0	99,0	14,0	135,0
S5	E7	43,0	33,0	24,0	13,0	13,0	46,0	48,0	24,0	13,0	5,0	13,0	25,0	33,0	24,0	46,0	11,0	37,5
S5	E8	34,0	33,0	24,0	13,0	11,0	38,0	51,0	19,5	13,0	4,0	13,0	24,0	31,0	21,0	42,5	9,0	33,5
S6	F7	12,0	16,5	15,0	6,0	11,0	27,0	29,5	17,0	11,0	6,0	7,0	18,0	23,5	12,0	36,5	8,0	17,0
S6	F8	14,0	16,0	16,0	8,0	11,0	27,5	32,0	17,0	10,5	5,0	8,0	17,0	23,0	11,0	33,0	10,0	18,0
S7	G7	14,0	13,0	16,0	6,0	12,0	32,0	29,0	25,0	12,5	5,0	7,0	18,0	29,0	10,0	33,0	12,0	15,0
S7	G8	11,5	9,5	12,0	8,0	10,5	29,0	31,0	13,0	13,0	5,0	6,0	15,0	23,5	9,0	29,5	9,0	11,5
B	H7	10,0	15,0	15,5	7,5	13,0	44,0	29,0	26,0	14,0	6,0	8,0	22,0	26,0	10,0	33,0	14,0	15,0
B	H8	8,5	11,0	11,0	7,0	10,0	25,0	27,0	17,0	10,0	6,0	6,0	17,0	19,0	9,5	28,0	7,0	11,0
B	H9	8,0	10,5	14,0	7,0	12,0	29,0	26,5	15,0	12,0	6,0	7,0	18,0	21,0	8,0	31,5	9,0	13,0
B	H10	12,5	11,0	14,0	5,0	12,0	29,0	26,0	17,0	10,0	5,0	8,0	16,0	21,0	8,5	30,0	11,0	11,0
ref S1	A9	9093,0	1136,0	5641,0	2386,0	5361,0	3243,0	4168,5	8031,5	18347,0	6489,5	3394,5	972,0	1076,0	845,0	2483,0	818,0	5939,0
ref S1	A10	8195,0	1167,0	5466,0	2414,5	5352,5	2738,0	4222,0	7656,5	17968,0	6523,0	3395,0	1032,0	1042,0	933,5	2457,0	803,0	5350,0
ref S2	B9	6544,0	415,5	3393,5	1304,0	2102,0	2395,0	2396,5	2955,0	7845,5	2272,0	1710,0	524,0	494,0	369,0	1360,0	143,5	2432,5
ref S2	B10	6708,0	391,0	2593,0	1071,0	1787,0	2172,0	2216,0	2766,0	7213,0	2116,0	1447,0	366,5	474,0	318,5	1088,0	116,5	2637,0
ref S3	C9	3560,0	169,0	675,0	401,0	415,0	1091,0	1248,0	746,0	1913,5	392,0	437,0	144,5	225,5	151,0	566,0	26,0	1056,0
ref S3	C10	4304,5	220,0	882,0	486,0	501,0	1254,0	1399,0	875,0	2174,0	500,0	589,0	157,5	251,5	182,0	640,5	26,0	1367,0
ref S4	D9	877,0	78,0	72,0	55,0	47,0	336,0	507,5	93,5	174,0	36,5	59,5	40,0	83,5	38,0	128,0	12,0	244,0
ref S4	D10	1324,0	96,0	96,0	65,0	50,5	385,0	594,0	114,0	205,0	43,5	87,0	39,0	90,5	47,5	170,0	11,0	327,5
ref S5	E9	339,5	37,0	35,5	12,0	11,0	142,0	220,0	31,0	41,0	11,0	16,0	24,0	40,5	20,0	63,0	12,0	85,0
ref S5	E10	362,0	32,0	35,0	10,5	13,0	131,0	214,0	31,0	42,0	10,0	13,0	26,0	40,0	19,0	65,0	11,0	76,0
ref S6	F9	78,0	17,0	16,0	9,0	10,0	48,0	85,5	19,0	19,0	5,5	11,0	20,0	31,0	10,0	40,5	10,0	32,0
ref S6	F10	66,0	18,0	20,5	8,0	12,0	48,5	84,5	19,0	16,5	6,0	10,0	17,5	25,0	12,0	37,0	10,0	30,0
ref S7	G9	20,0	12,0	14,0	6,5	11,0	38,0	43,0	18,0	11,0	5,0	7,0	18,0	22,0	11,0	33,5	10,5	15,0
ref S7	G10	28,0	12,0	15,0	5,0	9,0	39,0	47,0	16,0	11,0	4,0	8,0	17,0	21,0	9,0	34,0	10,0	16,0
LUMC#1	A11	2985,0	3284,0	5746,5	508,0	341,0	39,0	144,5	107,0	1043,5	132,0	267,5	19,0	1754,5	79,5	422,0	996,0	58,0
LUMC#2	B11	6434,0	222,0	164,0	5446,0	15,5	76,0	29,0	80,0	2203,0	37,5	4487,0	36,0	1164,0	12,0	93,0	9,0	77,0
LUMC#3	C11	5740,0	3356,0	5623,5	4117,0	67,0	126,5	105,0	1453,0	2972,0	1094,0	3239,0	25,0	852,5	48,0	268,0	853,0	77,0
LUMC#4	D11	4811,5	3764,0	6176,0	2267,0	329,0	67,0	39,0	139,0	381,0	133,0	1539,0	18,5	1485,0	20,0	666,5	10,0	50,0
LUMC#5	E11	2750,0	493,5	1370,5	2227,0	14,0	43,0	31,0	23,0	201,0	13,0	1417,0	16,0	1277,5	11,0	30,0	11,5	20,5
LUMC#6	F11	4269,0	2814,5	4516,5	3767,5	49,5	70,0	47,0	36,0	805,0	186,0	2645,5	19,0	1401,5	14,0	60,0	10,0	46,0
spiked 1500	H11	3971,0	175,0	530,5	155,0	843,5	1229,0	1452,0	1742,5	4782,0	539,0	250,5	203,0	232,5	182,0	589,5	83,0	1293,5
spiked 500	G11	923,0	65,0	51,0	12,0	84,5	417,5	595,0	263,0	746,0	59,5	28,0	54,0	57,0	49,0	185,0	11,0	354,0

## Sheet: lab 1- manu III lot A 
		GM-CSF (20)	IFNG (25)	IL-10 (27)	IL-12P40 (29)	IL-13 (35)	IL-17A (39)	IL-1RA (42)	IL-1a (44)	IL-1b (46)	IL-2 (48)	IL-5 (55)	IL-8 (63)	IP-10 (65)	MCP-1 (67)	MIP-1a (72)	MIP-1b (73)	TNF-a (75)
Type	Well	FI	FI	FI	FI	FI	FI	FI	FI	FI	FI	FI	FI	FI	FI	FI	FI	FI
S1	A1	9088,5	11034,0	12310,0	---	21254,0	21651,0	7334,0	14561,0	16131,0	19029,0	23099,5	24114,0	20150,0	24416,0	24373,0	18991,5	24732,0
S1	A2	9217,0	10132,0	11088,0	---	18909,5	21181,0	7195,0	14196,0	15322,0	18404,0	23110,5	24786,0	19392,5	25560,5	25494,5	19350,0	26287,0
S2	B1	3293,0	2509,0	3418,0	1703,0	5924,0	6644,0	2239,5	4446,5	7501,0	6200,0	7895,0	12639,0	5619,0	11014,0	21028,0	8195,5	12667,0
S2	B2	3337,0	2931,0	3509,0	1953,0	6827,0	7847,5	1899,5	5736,0	7173,0	7009,0	8574,5	13316,5	6755,5	13376,0	23765,5	8287,0	13527,0
S3	C1	927,0	639,0	854,0	387,0	1540,0	1838,0	393,5	1508,0	2029,5	1750,0	2518,5	4226,0	1125,0	2930,0	8892,0	1777,0	3427,0
S3	C2	1008,0	608,0	935,5	378,0	1467,0	1988,0	455,5	1464,0	2152,0	1882,0	2453,0	4341,0	1238,0	2827,0	6390,0	1878,0	3747,0
S4	D1	268,0	124,0	203,0	84,5	269,0	406,0	84,0	354,0	437,0	431,0	557,0	959,0	130,0	307,0	466,0	244,0	848,0
S4	D2	217,0	116,0	194,0	84,5	266,5	366,0	83,5	331,0	395,0	418,0	582,0	972,5	116,0	343,0	1502,5	169,0	778,5
S5	E1	84,0	38,5	58,0	31,0	64,0	99,0	30,0	123,5	86,0	132,0	115,0	219,0	32,0	44,0	117,0	37,5	201,0
S5	E2	72,0	37,5	57,0	34,5	62,0	99,0	25,0	95,0	85,0	129,0	115,0	212,5	27,0	39,0	112,0	33,5	196,5
S6	F1	36,5	21,0	28,0	20,0	22,0	44,0	13,5	53,0	25,5	75,0	30,0	52,0	21,0	16,0	20,5	13,5	83,0
S6	F2	40,0	16,0	24,0	18,5	19,0	40,0	13,0	48,0	26,0	74,0	27,0	56,0	18,0	15,0	19,0	13,0	80,0
B	G1	35,5	12,0	20,0	18,0	10,0	29,0	10,0	38,0	11,0	61,0	7,0	17,0	17,0	13,0	14,0	9,0	55,0
B	G2	36,0	13,0	20,0	18,0	11,0	27,0	12,0	45,5	12,0	61,0	9,0	18,0	18,0	12,5	11,0	9,0	55,0
B	H1	35,5	13,0	19,0	17,0	9,0	25,0	9,5	36,0	10,0	61,0	7,0	15,5	16,0	13,0	13,0	7,0	54,0
B	H2	38,0	14,0	20,0	15,0	10,0	27,0	9,0	35,0	11,0	60,0	6,0	18,0	15,0	13,0	15,0	10,0	54,0
B	H3	33,5	10,0	16,0	16,0	10,0	26,0	10,0	35,0	9,0	57,0	7,0	17,0	15,5	11,0	12,0	8,0	51,0
B	H4	39,0	13,0	20,5	16,0	9,0	25,0	9,0	36,0	10,0	59,0	8,0	17,0	16,0	12,0	13,0	9,5	58,0
ref S1	A3	9636,0	9367,5	22512,5	90,0	26090,5	18763,0	2698,5	17712,0	20203,0	11697,0	23102,5	15845,0	23691,0	25676,0	7382,0	8513,0	24978,0
ref S1	A4	9218,0	8956,5	21101,5	93,0	26345,0	18290,0	2757,0	16917,0	19194,0	11357,0	22491,0	15000,5	23148,0	25405,0	6701,0	7625,5	24761,0
ref S2	B3	5282,0	2343,5	12414,0	71,0	23561,0	9635,0	1034,0	12135,5	17602,5	5516,5	16188,5	7213,0	13198,0	24936,0	1640,0	3331,5	20743,0
ref S2	B4	5126,5	2039,0	11545,5	80,0	23105,0	8982,0	1013,5	11543,0	16633,0	4961,0	15608,0	6727,5	12320,0	24681,0	1410,0	3050,5	18586,0
ref S3	C3	2198,0	829,0	5528,0	56,0	12817,5	3512,0	365,0	6352,0	9744,5	1937,0	7153,0	2410,0	5509,0	17242,0	218,0	834,0	8731,0
ref S3	C4	2246,5	700,0	5322,5	50,0	11806,0	3250,0	355,5	5858,0	9771,0	1784,0	6804,0	2475,5	5069,0	15597,0	198,0	737,0	8532,5
ref S4	D3	774,0	206,0	1984,0	34,0	4755,0	1046,5	120,5	2564,0	4453,0	596,5	2545,0	896,0	1443,0	6291,5	41,0	217,5	3346,0
ref S4	D4	780,5	208,0	1818,0	32,5	4949,0	1049,0	108,0	2135,5	4153,5	583,5	2660,0	791,0	1355,0	6187,0	44,0	168,0	3019,0
ref S5	E3	279,0	56,0	633,0	21,0	1650,0	344,5	40,0	730,0	1363,0	229,0	818,0	250,0	276,0	1671,5	18,0	54,0	1040,0
ref S5	E4	293,0	58,0	627,0	23,0	1481,0	329,5	47,0	724,0	1332,0	225,0	875,5	239,5	252,5	1594,0	19,0	48,5	1086,0
ref S6	F3	98,0	27,5	215,5	17,0	454,0	117,0	18,0	278,0	442,0	110,0	262,0	82,0	58,0	406,0	16,5	21,0	337,0
ref S6	F4	103,0	25,0	224,0	15,0	449,0	120,0	16,0	246,0	421,0	104,5	275,0	87,0	58,5	405,0	14,0	24,0	371,0
ref S7	G3	61,0	16,5	81,0	16,0	153,0	55,0	13,0	112,0	150,0	74,0	90,0	40,5	26,0	86,0	13,5	13,0	156,5
ref S7	G4	55,0	17,0	86,0	17,0	141,0	55,0	13,0	111,0	138,0	68,0	97,0	42,0	26,0	78,0	12,0	13,0	151,0
LUMC#1	A5	2966,0	8415,0	652,0	44,5	2747,0	744,0	504,0	117,0	743,0	14352,0	951,0	24258,0	2954,5	12038,5	24324,0	15768,0	23342,0
LUMC#2	B5	596,0	997,0	232,0	43,0	5362,5	164,0	1187,0	170,0	49,0	117,0	2610,0	13190,0	24590,0	25460,0	386,0	146,0	4175,0
LUMC#3	C5	1890,5	5322,0	5414,5	60,0	8073,0	4489,0	1355,5	236,5	564,0	16459,5	1840,0	25066,5	23837,0	24431,0	23663,0	16258,0	18114,5
LUMC#4	D5	3540,0	13394,5	461,0	48,0	2046,5	760,0	206,0	134,0	89,5	90,5	326,0	21705,0	19170,0	22968,0	24263,0	15146,0	6980,0
LUMC#5	E5	542,0	363,0	60,0	25,0	207,5	376,0	830,0	85,0	70,5	72,0	22,0	16378,5	12563,0	7755,5	23833,0	10076,0	13911,5
LUMC#6	F5	174,0	37,0	35,0	24,0	75,5	35,5	1416,0	52,5	25,0	61,0	18,0	9702,0	7883,0	8381,0	1490,5	965,0	2231,0
spiked 1500	H5	2627,0	2001,5	6170,5	43,0	14027,0	2827,5	486,0	8075,0	12786,0	2069,0	9686,5	2389,0	2779,0	19949,0	311,5	916,5	12303,0
spiked 500	G5	581,0	198,0	1224,5	33,0	3110,5	394,5	158,0	3771,5	6342,0	355,0	2908,0	463,0	92,0	6589,0	46,5	109,0	4582,5
S1	A7	5209,0	9349,0	10792,0	4556,5	9614,0	8245,0	6371,0	14145,0	9121,0	9429,0	7743,0	17188,0	11872,0	12766,0	10904,5	11576,5	16757,5
S1	A8	5641,0	10303,0	10773,0	4782,0	10101,0	9123,5	6822,5	15872,5	10221,5	10433,5	5807,0	18075,5	13318,0	12384,0	11059,5	12091,0	17811,0
S2	B7	4363,0	4548,0	4897,5	2443,0	4815,0	4170,0	3375,5	9279,0	8276,0	6296,5	4128,5	12212,0	6078,0	7967,0	10338,5	11058,0	13492,0
S2	B8	3414,5	3346,0	4129,5	2002,5	4668,0	4053,0	2289,0	7418,0	6905,0	5247,0	4418,0	10470,0	4615,0	6576,0	9961,0	8446,0	11203,5
S3	C7	1550,5	1047,0	1288,0	649,5	1518,0	1318,5	735,0	3446,0	2473,0	2542,0	1659,0	6013,0	1407,5	2578,0	7059,0	5132,0	5045,0
S3	C8	1465,0	937,0	1080,0	516,5	1317,0	1139,0	585,5	3013,5	2555,0	2164,0	1321,5	5387,0	1134,5	2070,5	6618,0	4619,0	4592,5
S4	D7	308,0	174,0	264,0	161,0	249,0	272,5	115,0	648,0	470,5	454,0	454,0	1542,0	110,5	329,0	1141,0	942,5	1142,0
S4	D8	494,0	206,5	298,0	165,0	286,0	316,0	124,5	659,0	656,0	611,5	542,5	1813,0	135,5	403,5	669,5	1018,0	1419,5
S5	E7	75,0	51,5	62,0	77,0	53,0	62,0	27,0	167,0	114,5	117,0	115,0	343,5	19,5	41,0	122,5	110,0	288,0
S5	E8	109,5	47,0	74,0	82,0	60,0	91,0	35,0	143,5	132,0	119,0	142,0	397,0	20,5	47,0	131,0	114,0	352,0
S6	F7	28,0	18,0	22,0	52,5	16,0	24,0	12,5	65,0	29,0	34,0	30,0	81,5	10,0	13,0	23,0	20,5	97,0
S6	F8	98,5	42,0	66,0	70,5	52,0	70,0	27,0	145,0	104,0	123,0	123,0	371,0	17,0	39,0	108,5	94,0	302,0
B	G7	19,0	8,0	15,0	47,0	8,0	15,5	7,0	39,0	8,0	23,0	6,0	11,5	7,0	8,0	14,0	9,0	49,0
B	G8	20,0	12,0	14,0	58,0	8,0	14,0	7,0	49,0	8,0	24,0	5,5	10,0	8,5	11,0	16,0	7,0	49,0
B	H7	17,0	8,5	11,0	45,0	7,0	13,0	8,0	48,0	9,0	21,0	4,0	11,0	9,0	9,0	15,0	8,0	50,0
B	H8	19,5	8,0	11,5	50,0	7,0	16,0	7,0	37,5	9,0	21,0	5,0	10,5	8,0	9,0	12,0	9,0	53,0
B	H9	16,5	12,0	14,0	52,0	9,0	15,0	7,0	43,0	8,0	26,0	7,0	11,0	8,0	9,0	15,0	8,0	54,0
B	H10	19,0	11,0	13,0	48,0	9,0	13,0	7,5	40,0	7,0	25,0	5,0	9,0	8,0	8,0	13,0	8,0	50,0
ref S1	A9	5674,0	7782,0	15585,5	111,0	14464,5	8773,0	2266,0	15818,0	12725,5	8043,0	7903,0	12838,0	14449,0	13258,0	6696,5	9403,0	17717,5
ref S1	A10	5331,0	9681,0	15049,5	138,0	12799,0	7931,0	3453,0	16380,0	11654,0	8186,0	5869,0	13252,0	15515,0	12091,0	6056,5	9654,0	17044,0
ref S2	B9	5057,0	3832,0	11889,0	104,0	11723,0	5268,5	1794,0	14962,0	11784,0	5564,0	5635,0	8456,0	10681,0	12116,0	1803,0	7262,0	16579,0
ref S2	B10	4505,0	3506,0	10940,5	97,0	11924,0	5091,5	1246,5	14255,0	11474,0	5137,0	5234,0	8077,0	10268,5	11512,0	2470,0	6583,0	15849,5
ref S3	C9	2618,0	1093,0	5863,0	86,5	7703,0	2387,5	290,0	9153,0	8743,0	2295,0	2906,0	3669,0	4826,0	8807,5	645,0	2725,5	9406,5
ref S3	C10	2876,5	1325,0	6059,0	69,5	7047,0	1978,5	415,5	9528,0	9196,5	2378,0	2910,5	3561,5	4577,0	8648,5	287,0	2945,0	9821,5
ref S4	D9	1272,0	258,0	2646,5	55,0	3459,0	723,0	102,0	3651,5	4886,5	674,0	1664,0	1321,0	1329,0	3784,5	61,0	672,0	3994,0
ref S4	D10	1604,0	369,0	2943,0	77,0	4613,0	817,0	178,0	5334,5	6357,0	1012,5	2237,5	1495,5	2035,0	6250,5	147,5	789,0	4981,0
ref S5	E9	338,5	59,0	878,0	40,5	1310,0	240,0	35,5	1118,0	1797,5	194,5	736,0	363,0	224,5	1492,0	26,0	121,5	1357,0
ref S5	E10	522,0	89,0	1003,0	54,0	1726,0	287,0	39,0	1657,0	2131,5	265,0	689,0	458,0	360,0	1656,5	23,0	172,0	1807,0
ref S6	F9	139,0	25,0	269,0	39,0	477,0	92,0	15,0	331,0	682,0	74,5	240,0	135,0	47,0	310,0	11,0	35,0	468,0
ref S6	F10	215,5	40,0	419,0	56,0	690,0	125,0	20,0	732,5	882,0	119,0	361,5	183,0	87,5	624,5	21,0	53,5	733,0
ref S7	G9	143,0	24,0	224,0	60,0	310,0	88,0	19,0	331,0	519,0	87,0	245,0	92,0	33,0	180,5	20,0	25,0	398,0
ref S7	G10	84,0	17,5	140,0	59,5	162,5	49,5	11,0	185,0	239,0	48,5	107,0	64,0	20,0	82,0	16,0	18,5	262,0
LUMC#1	A11	2069,0	8352,0	873,0	71,0	1408,0	652,0	478,0	137,0	706,0	8706,0	439,5	17749,5	2944,0	6483,0	11286,0	12244,0	14787,5
LUMC#2	B11	670,0	1448,0	249,5	80,0	2641,0	121,0	1328,5	154,0	43,0	71,0	1040,0	10843,0	16011,0	11397,0	629,5	380,5	4037,0
LUMC#3	C11	1836,5	6300,0	5475,0	97,0	3507,0	2475,0	1310,0	306,5	628,0	9592,0	997,0	19032,0	15660,0	11625,0	11275,0	12437,0	11567,0
LUMC#4	D11	3181,0	12404,0	659,5	89,5	1862,5	636,0	228,5	156,0	119,0	64,5	230,0	17027,0	14452,0	11981,0	12603,0	13456,5	8117,0
LUMC#5	E11	656,0	529,0	79,0	64,5	292,0	385,5	1049,5	99,5	96,5	41,5	17,0	14581,0	10909,0	5765,0	12506,0	10666,0	10924,5
LUMC#6	F11	170,0	43,5	41,0	50,0	95,0	29,0	2090,0	69,0	25,0	29,0	14,0	10047,0	7171,0	4904,5	1640,0	2976,0	3180,0
spiked 1500	H11	3379,0	2885,0	7009,0	89,0	8737,0	2026,0	553,0	11712,0	11429,5	2555,0	4447,5	3771,5	3224,0	11150,0	867,5	2534,0	12430,0
spiked 500	G11	1073,5	384,0	1856,0	70,5	3103,0	343,0	153,0	6418,0	7855,5	476,5	2223,0	875,5	135,0	5610,0	77,5	298,0	6371,0

## Sheet: lab 1- manu IV lot A 
		TNF-a (12)	IP-10 (21)	MCP-1 (25)	IL-1RA (30)	MIP-1B (37)	IL-17A (42)	GM-CSF (46)	IFN-G (29)	IL-8 (18)	IL-10 (22)	IL-1B (28)	MIP-1A (35)	IL-1A (38)	IL-2 (43)	IL-5 (53)	IL-18 (78)
Type	Well	FI	FI	FI	FI	FI	FI	FI	FI	FI	FI	FI	FI	FI	FI	FI	FI
S1	A1	2187,0	3019,0	16532,5	651,5	4969,5	1864,0	1937,5	810,0	2711,5	3094,0	1747,0	17759,5	1185,5	3704,0	5309,0	2153,0
S1	A2	2163,0	3089,0	16986,0	616,0	4938,0	1841,0	1999,5	836,0	2706,0	3162,0	1741,5	18229,5	1124,0	4174,0	5366,0	2201,0
S2	B1	616,0	910,0	8881,5	242,0	2176,0	671,0	749,5	288,0	983,0	1224,0	588,0	11200,0	355,5	1435,0	1694,0	769,0
S2	B2	603,0	889,0	8796,5	243,0	2118,0	622,5	697,0	291,0	998,0	1085,0	612,0	11126,5	341,0	1275,0	1506,0	784,0
S3	C1	165,0	236,5	2581,0	97,5	605,0	220,0	250,5	102,5	321,5	373,0	196,0	2482,0	101,5	316,0	372,0	277,0
S3	C2	192,5	268,0	2661,0	109,0	643,0	240,5	275,5	116,0	373,0	430,0	218,0	2521,0	110,5	377,5	404,0	289,0
S4	D1	65,0	80,5	590,0	49,0	131,5	86,5	106,0	51,0	140,0	164,0	79,0	351,0	45,0	130,0	95,5	116,0
S4	D2	64,5	77,0	579,0	55,0	130,0	87,5	105,5	49,5	130,0	154,0	77,0	351,0	46,5	120,0	90,0	120,0
S5	E1	37,0	33,0	120,0	129,5	39,0	40,0	53,0	29,0	57,0	80,0	36,0	59,0	25,0	86,0	27,0	56,5
S5	E2	37,0	32,0	126,0	134,5	39,0	40,0	57,0	31,5	62,5	95,0	36,0	65,0	26,0	94,0	26,0	60,0
S6	F1	27,0	18,0	61,0	29,0	23,0	24,0	40,0	25,0	36,0	59,0	23,0	27,5	21,0	81,5	14,0	40,0
S6	F2	26,0	17,0	60,0	28,0	27,0	24,0	43,0	24,0	37,0	62,0	24,5	28,0	22,0	83,5	14,0	39,5
S7	G1	25,0	13,5	---	---	23,5	20,0	36,0	---	29,0	---	20,0	---	---	---	10,0	33,0
S7	G2	24,0	13,0	---	---	24,0	20,0	38,0	---	26,0	---	20,0	---	---	---	10,0	34,0
B	H1	21,0	11,0	47,0	23,0	26,0	19,0	35,0	22,0	22,0	47,0	18,0	22,5	19,0	73,0	9,0	32,0
B	H2	20,0	13,0	55,0	26,0	24,0	16,0	30,5	20,0	23,0	50,0	19,0	21,0	19,0	70,0	8,0	31,0
B	H3	22,0	12,0	55,0	22,0	22,0	16,0	33,0	21,0	25,0	45,0	17,5	21,0	19,0	73,0	7,0	31,0
B	H4	21,5	12,0	47,0	22,0	25,0	17,0	31,0	21,0	23,0	43,0	17,0	22,0	18,0	64,5	8,5	31,0
ref S1	A3	12146,0	16027,0	20460,0	6103,0	2383,0	11385,0	7093,0	1886,0	8164,0	17214,0	12820,0	425,5	7055,0	8856,0	16600,0	6695,0
ref S1	A4	11586,0	17125,0	20218,0	6118,0	2317,0	11213,5	7089,0	1836,5	8213,0	16370,0	13551,0	361,0	7386,0	7280,0	16620,0	6217,0
ref S2	B3	3522,5	10091,0	14892,0	3664,0	669,5	4163,0	3450,5	545,0	3601,0	7619,0	8962,5	117,5	5839,0	2233,0	11649,0	2153,0
ref S2	B4	3381,5	9741,5	14455,5	3435,5	656,0	4066,5	3221,5	475,0	3258,0	7484,0	8624,0	117,0	5527,5	2363,0	11427,0	2152,5
ref S3	C3	1328,0	4677,0	6301,5	1799,0	156,0	1507,5	1252,0	177,0	1419,0	3148,0	4966,5	48,5	3986,0	715,0	5506,0	739,0
ref S3	C4	1140,5	4157,0	5905,0	1604,0	134,0	1375,5	1112,5	152,0	1213,0	2721,0	4631,0	45,5	3724,0	597,0	4950,0	623,0
ref S4	D3	412,0	1348,5	1566,0	594,0	45,5	465,0	404,0	58,0	426,0	1052,0	1686,0	30,0	1483,0	207,0	1405,0	250,0
ref S4	D4	424,5	1362,0	1574,5	589,0	42,0	475,0	390,5	60,0	427,5	971,0	1780,5	28,0	1562,5	178,0	1417,0	238,0
ref S5	E3	149,0	400,0	328,0	225,0	28,0	167,0	154,0	35,0	152,5	357,5	620,0	25,0	500,5	100,5	324,0	98,0
ref S5	E4	142,0	346,5	317,0	209,5	28,0	149,0	148,5	33,0	141,0	314,0	570,5	24,0	453,0	87,0	272,0	95,0
ref S6	F3	65,0	115,5	88,5	92,5	26,0	65,0	69,0	25,0	65,0	149,5	215,0	23,0	142,0	76,0	66,0	53,5
ref S6	F4	62,0	105,0	86,0	86,5	25,0	62,5	65,5	24,0	66,0	131,0	201,0	22,0	129,0	71,0	63,0	50,0
ref S7	G3	33,5	37,0	56,0	43,5	23,0	31,0	45,0	21,0	36,0	71,0	76,0	21,0	50,0	63,0	20,0	37,5
ref S7	G4	36,0	38,0	61,5	47,0	24,0	30,0	46,0	22,0	34,5	83,0	81,0	23,0	50,5	80,0	19,0	42,0
LUMC#1	A5	8230,0	417,5	9978,0	3277,0	1758,5	760,0	2657,5	1000,0	11233,0	151,0	415,0	20637,0	148,5	7681,0	324,5	49,0
LUMC#2	B5	942,0	16582,0	20507,0	5684,5	148,5	128,0	318,5	106,5	8574,0	190,0	54,0	162,0	148,5	1504,0	1444,0	51,0
LUMC#3	C5	5355,0	11026,0	19875,5	5079,0	3808,0	3190,0	1051,0	327,0	13032,0	1121,0	297,0	18945,0	243,5	9626,5	578,5	62,5
LUMC#4	D5	1386,0	7249,5	14921,0	1640,5	3091,0	580,0	2243,0	1009,0	10878,0	130,5	91,0	18951,0	120,5	1017,0	66,0	43,5
LUMC#5	E5	3156,0	2040,5	13738,0	4232,5	503,0	464,0	882,0	69,0	6004,0	76,0	50,0	18279,0	114,0	944,0	10,0	46,0
LUMC#6	F5	327,0	1194,0	13645,0	5606,0	92,0	46,0	231,0	27,0	5890,5	70,0	39,0	241,0	83,5	958,0	9,5	39,0
spiked 1500	H5	3013,0	1576,0	10795,0	2638,0	147,5	682,5	1101,0	220,0	1281,5	3101,0	7561,0	69,5	5433,0	1177,0	7428,0	1018,0
spiked 500	G5	975,0	345,5	3538,0	1082,0	53,0	306,0	317,0	66,5	409,0	777,0	3462,0	40,0	2740,0	470,0	2098,5	359,5
S1	A7	4682,0	5953,5	25274,0	1388,0	9742,0	3596,0	4355,5	1685,5	5672,0	6808,0	3862,0	26132,0	2318,0	22034,0	10337,0	4702,0
S1	A8	4582,0	6146,0	25463,0	1264,0	10152,0	3544,0	4499,5	1652,5	5575,5	6671,5	3787,0	25767,0	2327,5	21407,5	10238,0	4519,5
S2	B7	1450,5	1848,5	15790,0	489,5	4411,5	1277,0	1635,0	636,0	2120,0	2644,0	1328,0	19406,0	704,0	18663,5	3187,5	1668,0
S2	B8	1411,0	1874,0	15997,0	490,0	4438,0	1229,0	1658,5	602,0	2143,5	2475,0	1336,0	19754,0	714,5	19334,0	3049,0	1695,0
S3	C7	412,5	519,5	5209,5	215,5	1309,0	457,0	651,5	246,0	824,0	1135,0	510,0	4907,0	210,0	19145,0	783,0	615,0
S3	C8	422,0	506,0	5073,0	206,0	1271,5	446,5	596,0	227,0	753,5	1120,0	467,5	5063,0	214,5	18278,0	730,0	587,0
S4	D7	151,0	149,0	1131,5	98,0	254,5	155,0	259,0	106,5	301,0	569,0	171,5	726,0	73,0	18124,0	159,5	231,0
S4	D8	147,0	156,0	1159,0	94,0	257,0	164,0	249,5	102,5	282,5	595,5	177,0	750,0	76,0	18007,0	160,0	223,5
S5	E7	77,5	57,0	263,0	487,5	73,0	72,0	143,5	63,0	131,5	414,0	86,0	112,0	43,0	18047,0	45,0	106,5
S5	E8	78,0	60,5	255,0	260,0	77,5	76,0	135,5	63,5	129,0	375,0	83,0	124,0	48,0	18390,0	47,0	103,5
S6	F7	58,5	34,0	129,0	51,0	48,5	43,0	99,0	49,0	72,0	368,5	58,0	45,5	36,0	17772,0	21,0	64,0
S6	F8	56,0	31,0	129,0	52,0	51,0	42,0	100,5	50,0	74,0	358,0	57,0	45,0	31,0	17909,0	20,0	68,5
S7	G7	47,0	24,0	113,0	47,0	48,0	32,0	86,5	47,5	57,0	349,5	49,0	37,0	31,0	18608,5	14,0	53,5
S7	G8	51,0	27,5	108,5	51,0	47,0	34,0	91,5	50,0	51,0	349,5	51,0	38,0	35,0	19676,5	14,0	60,0
B	H7	42,0	19,0	87,0	37,5	49,0	27,0	79,0	45,5	46,0	357,0	44,0	36,0	26,0	17530,0	11,0	46,0
B	H8	46,5	21,0	106,5	39,0	50,5	27,5	89,0	46,0	48,0	338,0	44,0	36,0	31,0	18532,0	11,0	49,5
B	H9	46,0	18,5	99,0	38,0	46,0	29,0	79,0	46,0	48,5	336,0	42,0	36,0	30,5	17906,5	10,0	47,5
B	H10	44,0	19,0	111,5	41,0	46,0	27,0	89,0	44,5	51,0	395,0	46,0	35,0	28,5	17463,0	11,0	53,0
ref S1	A9	21127,0	25367,0	26299,0	11556,0	4944,0	19512,0	14175,0	3880,0	15877,0	24904,5	23067,0	770,0	14609,0	24188,0	25014,0	12497,0
ref S1	A10	21278,5	24217,5	26246,0	11514,0	5099,0	21728,5	15100,0	4692,5	15516,0	26014,0	22867,0	867,0	14056,0	24770,5	24631,0	12298,0
ref S2	B9	7343,0	19341,5	24060,5	7084,5	1399,0	8258,5	6992,0	1088,0	7156,5	15086,0	17310,5	234,5	12184,0	20532,0	21506,5	4477,5
ref S2	B10	7207,5	18225,0	23719,5	6969,0	1349,0	7644,0	7123,0	999,0	7110,5	14366,0	17269,0	239,0	11561,0	19605,0	20329,0	4221,0
ref S3	C9	2668,0	7943,0	10841,0	3216,5	322,0	2807,0	2798,0	335,0	2721,0	6128,5	8783,0	94,0	6632,5	19362,0	9458,5	1530,0
ref S3	C10	2581,0	7813,0	10797,0	3211,0	296,5	2724,0	2591,0	330,0	2673,0	5860,0	8840,0	85,0	7076,0	17545,5	9417,5	1489,0
ref S4	D9	921,0	2635,0	2993,0	1219,5	93,0	926,0	957,5	126,0	927,0	2399,0	3836,5	51,0	3098,0	17500,0	2770,5	519,0
ref S4	D10	878,0	2648,0	2927,0	1194,0	93,0	848,0	899,5	125,5	928,0	2227,5	3635,5	50,0	2870,0	17840,0	2466,0	511,5
ref S5	E9	360,0	810,5	707,0	466,0	60,0	323,5	383,0	76,0	350,0	1103,0	1431,5	44,0	974,0	19934,0	576,0	210,5
ref S5	E10	316,0	718,0	657,0	425,0	57,5	311,5	349,0	72,5	320,0	1013,0	1268,5	42,0	909,0	17641,0	576,0	199,0
ref S6	F9	145,5	217,0	180,0	169,0	53,0	124,0	174,0	57,0	136,0	596,0	434,0	42,0	254,0	18561,5	122,0	104,0
ref S6	F10	141,0	210,0	197,0	178,0	52,5	114,0	173,0	59,0	136,0	541,5	465,0	36,5	267,0	17336,0	122,0	99,0
ref S7	G9	72,5	78,5	127,5	81,0	49,0	54,0	103,0	46,0	79,0	361,5	180,0	39,0	94,0	17681,0	34,0	61,5
ref S7	G10	76,0	78,0	132,0	80,0	46,0	57,0	109,5	46,0	72,0	436,5	182,0	37,0	91,0	17499,0	32,0	59,0
LUMC#1	A11	16519,0	1138,5	19900,0	6811,0	4279,5	1396,0	6005,5	2555,0	20253,0	883,0	1171,5	26195,0	323,0	24267,5	1013,0	107,0
LUMC#2	B11	2182,0	24173,0	26007,5	10788,0	314,0	249,0	741,0	232,0	16365,0	783,0	118,0	323,0	309,0	21441,0	2752,0	94,5
LUMC#3	C11	10597,0	18881,5	26235,0	9031,0	7177,0	5800,0	2138,5	673,0	22026,0	2620,0	611,0	25540,0	447,5	24718,0	1045,0	106,5
LUMC#4	D11	3023,0	13049,5	23658,0	3180,0	6235,0	1083,0	4907,5	2120,5	20042,0	667,5	211,0	25906,0	243,0	20096,0	113,0	81,0
LUMC#5	E11	6511,5	4287,0	23283,0	8276,5	1034,0	866,5	2117,0	147,0	11895,0	524,0	104,0	25338,0	200,5	20575,0	14,0	80,0
LUMC#6	F11	727,0	2181,0	23360,0	10482,5	181,0	74,5	491,0	57,0	11208,0	542,0	77,5	440,0	145,5	20243,0	12,0	72,5
spiked 1500	H11	6248,0	3167,0	18464,0	4877,0	471,5	1720,0	3259,5	329,0	2741,0	6496,5	13675,0	187,0	9664,0	22080,0	12477,5	1771,0
spiked 500	G11	2014,0	655,0	6290,0	2062,0	99,0	535,0	719,0	134,5	757,0	1854,0	6778,0	65,0	5085,0	19726,5	3866,0	649,0

## Sheet: lab 2- manu I lot A
		Hu IL-1b (39)	Hu IL-1ra (25)	Hu IL-2 (38)	Hu IL-5 (33)	Hu IL-8 (54)	Hu IL-10 (56)	Hu IL-13 (51)	Hu IL-17 (76)	Hu GM-CSF (34)	Hu IFN-g (21)	Hu IP-10 (48)	Hu MCP-1(MCAF) (53)	Hu MIP-1a (55)	Hu MIP-1b (18)	Hu TNF-a (36)
Type	Well	FI	FI	FI	FI	FI	FI	FI	FI	FI	FI	FI	FI	FI	FI	FI
S1	A1	18515,0	---	12911,0	19869,5	---	11566,5	14682,0	15071,0	15530,0	7605,0	13657,5	6235,0	14129,0	---	11540,5
S1	A2	19639,5	---	13861,0	21132,5	---	12445,0	15788,0	15980,0	17019,0	7873,0	14323,5	6592,0	15347,0	---	12334,5
S2	B1	11780,0	11032,0	9507,0	16188,0	6878,0	8930,0	6945,5	6447,0	7556,0	709,0	5758,0	5168,0	7782,0	13725,0	6164,5
S2	B2	12471,0	11310,5	10067,0	17123,5	7242,0	9580,5	7317,0	6869,0	7624,0	773,0	5948,0	5606,0	8222,0	14312,5	6273,0
S3	C1	4988,0	4828,0	3988,5	7582,0	4236,0	4524,5	2171,0	1889,0	2200,5	148,5	1760,0	2860,0	2785,0	8020,5	1864,0
S3	C2	4849,5	4780,0	4184,0	7570,5	4150,0	4606,0	2230,0	1852,0	2111,0	145,0	1770,5	2801,0	2728,0	6855,0	1875,0
S4	D1	1272,0	1039,5	1186,0	1679,0	1225,5	1646,0	421,0	464,0	540,5	43,0	333,0	970,0	599,5	1676,0	457,0
S4	D2	1399,0	1075,5	1270,5	1871,0	1434,0	1835,0	456,5	510,0	562,0	43,0	359,0	1076,0	686,0	1875,0	499,0
S5	E1	307,5	186,5	358,5	223,0	374,5	527,0	88,0	136,0	179,0	18,0	49,0	268,0	91,0	284,0	123,0
S5	E2	326,5	209,0	373,5	232,0	374,0	561,0	84,0	155,0	198,5	20,5	50,0	268,0	95,0	311,5	131,0
S6	F1	83,0	52,5	115,0	40,0	127,0	159,0	30,0	58,0	90,0	10,0	15,0	73,0	22,0	78,0	42,0
S6	F2	97,5	61,0	136,0	42,0	110,0	196,0	33,0	68,0	102,0	13,0	15,0	97,5	20,0	80,5	48,0
S7	G1	35,0	29,0	73,0	16,0	42,5	68,0	---	43,0	84,0	---	---	48,0	16,0	45,0	20,0
S7	G2	43,0	27,0	72,0	16,0	40,0	66,5	---	44,0	77,0	---	---	48,0	14,5	47,0	22,0
B	H3	26,0	24,0	84,0	13,0	20,0	39,0	18,0	61,0	738,0	13,0	13,0	76,0	16,5	48,0	18,0
B	H4	17,0	22,5	90,5	11,0	17,0	35,0	15,0	60,0	836,5	11,5	14,0	74,0	15,0	50,0	15,0
B	G12	37,0	21,0	54,0	14,0	73,0	38,0	18,0	36,0	42,5	12,0	276,0	50,0	15,0	48,0	17,0
B	H12	19,0	18,0	41,0	11,0	25,0	28,0	17,0	33,0	43,0	12,0	11,0	30,0	14,0	37,0	14,0
ref S1	A3	23473,5	10130,0	12974,5	16907,0	4943,0	9442,5	23859,0	15327,0	20810,0	787,5	23690,5	3916,0	5572,0	19511,0	12472,0
ref S1	A4	23612,0	10123,0	12921,0	16848,0	5116,0	9386,0	23931,5	15517,0	21176,0	688,5	24110,0	3860,5	5807,0	19961,0	12512,0
ref S2	B3	21508,5	4222,0	7680,0	14651,0	3042,0	5440,5	21592,0	7818,0	13094,0	217,0	11643,0	3537,0	2437,0	17099,0	6831,0
ref S2	B4	21615,0	4247,5	8181,0	14598,0	3229,0	5678,0	22274,0	8034,0	13409,0	224,0	12179,0	3536,0	2666,0	17462,5	6984,0
ref S3	C3	15687,0	1172,5	3123,0	7881,5	1115,0	2376,0	11369,5	2343,0	6117,0	73,0	4461,5	1692,0	471,0	7773,5	2474,0
ref S3	C4	15718,0	1201,0	3422,5	8049,0	1269,0	2421,0	11957,0	2554,0	6426,0	69,0	4934,5	1633,0	549,0	8156,0	2528,5
ref S4	D3	8346,5	303,0	799,0	2023,5	291,0	802,0	4002,0	474,0	2260,0	28,0	730,0	343,0	71,0	1667,5	798,5
ref S4	D4	7549,0	245,0	975,0	1693,0	766,5	667,5	4122,5	496,0	2128,5	31,0	6896,0	804,0	76,5	2160,0	681,0
ref S5	E3	2883,0	79,0	188,5	202,0	65,0	168,5	750,0	174,0	961,0	17,0	106,0	97,5	24,0	312,0	208,5
ref S5	E4	3207,0	79,0	273,5	276,5	78,0	216,5	1007,0	193,5	1114,0	17,0	219,0	108,5	26,0	386,5	212,0
ref S6	F3	600,0	30,0	104,0	27,0	28,0	59,0	136,0	83,0	779,0	14,0	20,0	73,0	17,0	85,0	55,0
ref S6	F4	633,5	29,0	114,5	29,0	30,0	69,5	168,0	85,0	769,5	13,0	23,0	70,0	19,0	105,0	55,0
ref S7	G3	111,0	24,0	94,5	12,0	20,0	44,0	42,5	66,0	811,0	13,0	14,0	77,0	17,0	59,0	27,0
ref S7	G4	152,0	23,0	95,0	14,0	22,0	52,0	59,0	64,0	658,5	13,0	15,0	67,5	17,0	57,5	27,0
LUMC#1	A5	3330,0	1438,0	13587,0	1143,0	8992,5	389,0	4980,5	846,5	3305,5	3116,5	5814,0	587,0	17220,5	18931,0	5446,0
LUMC#2	B5	78,0	4098,0	177,0	1719,5	5008,0	155,0	6755,5	238,0	538,0	114,0	24525,0	2638,0	911,5	3861,0	166,0
LUMC#3	C5	1818,5	3908,5	14404,0	1243,5	9946,0	3108,0	9223,0	4232,0	963,5	736,0	24409,0	832,5	17565,5	18585,0	2388,0
LUMC#4	D5	470,0	268,5	117,0	95,0	7546,0	389,0	3270,5	811,0	4551,0	3668,0	20873,5	1088,0	18009,0	19937,0	141,5
LUMC#5	E5	233,0	8856,0	154,0	217,0	8068,0	120,0	1305,0	205,0	567,0	51,0	23172,0	1161,5	5511,0	16436,0	78,0
LUMC#6	F5	853,5	5705,5	137,0	253,0	7994,5	122,0	3696,0	1177,5	1375,0	93,0	24009,5	887,0	16634,0	19302,0	1035,0
spiked 1500	H5	18516,5	305,0	2677,0	9264,0	1404,5	2652,0	10560,0	2232,0	5072,0	124,0	4075,0	2820,0	1779,0	10805,0	1323,0
spiked 500	G5	11061,0	82,0	401,0	1559,0	266,0	415,0	2292,0	247,0	1495,0	32,0	69,0	483,5	167,0	1243,5	785,0
S1	A6	22423,0	15752,5	19415,0	25312,0	9321,0	13567,0	24762,0	20500,0	23148,5	3304,0	12641,0	8927,0	21105,0	23889,0	15540,0
S1	A7	21812,0	15258,0	18242,0	24788,0	9384,0	12619,0	24586,0	20070,0	23838,5	3162,0	11824,5	8231,0	20713,0	23987,0	14695,0
S2	B6	13259,5	11756,0	11592,0	22859,5	7061,0	9261,0	9887,0	7334,0	8911,0	575,5	4971,0	6003,5	10161,5	17928,5	7983,0
S2	B7	12898,0	11206,0	11609,0	22335,0	7231,0	8910,5	9616,0	7072,5	8920,5	550,0	4887,0	5853,0	9954,5	17301,5	7656,0
S3	C6	4401,5	4310,0	3552,0	7836,0	2887,0	4077,0	2349,0	1604,0	1894,5	104,0	1337,0	2693,0	2833,5	6742,0	1907,0
S3	C7	4506,5	4442,0	3687,0	8164,0	3312,0	4265,0	2469,5	1593,0	1908,5	107,0	1130,0	2848,0	2951,0	6541,5	1994,0
S4	D6	1154,0	1103,0	1133,0	1628,5	1487,0	1504,0	545,0	490,0	540,0	38,0	2644,0	1190,0	669,0	2845,0	502,5
S4	D7	1183,5	981,0	1016,0	1584,0	1075,0	1509,0	492,5	436,5	450,0	37,0	243,0	919,0	657,0	2400,0	504,5
S5	E6	242,0	178,0	276,0	203,0	255,0	469,0	84,0	130,0	143,0	18,0	52,0	246,0	94,0	273,0	132,0
S5	E7	273,5	187,5	281,5	237,5	283,0	525,0	87,0	130,5	150,0	19,0	47,0	252,0	107,0	325,0	142,0
S6	F6	82,0	53,5	102,0	39,5	92,0	157,0	33,0	59,0	78,0	13,0	26,0	86,0	26,0	85,0	49,0
S6	F7	73,0	53,0	99,0	33,5	102,5	150,0	31,5	55,0	69,5	13,0	133,0	86,0	24,0	88,5	45,0
S7	G6	36,0	47,0	73,0	18,0	234,5	72,0	22,0	48,5	62,5	12,0	142,5	94,0	40,0	168,0	25,0
S7	G7	45,5	28,0	59,0	18,0	42,5	72,0	20,5	43,0	60,5	13,5	19,0	51,0	17,0	47,0	26,0
B	H9	17,0	18,0	58,0	12,0	19,0	27,0	15,0	54,0	435,0	13,0	15,0	54,0	17,0	40,0	15,0
B	H10	20,0	22,0	53,0	12,0	23,0	28,0	18,5	54,0	399,0	14,0	15,0	55,0	16,0	44,0	16,0
B	E12	24,0	21,0	48,0	14,0	41,0	42,0	16,0	36,0	44,0	12,0	13,0	35,0	14,0	41,0	17,0
B	F12	69,0	23,0	68,0	12,0	168,0	42,5	25,0	40,0	53,0	13,0	1462,0	74,0	17,0	64,5	18,0
ref S1	A9	24510,0	10219,0	16175,5	21085,0	4271,0	9428,0	24838,5	18795,0	24349,5	554,0	24894,0	3530,5	6024,0	23905,0	15995,0
ref S1	A10	24520,0	10574,0	16786,0	21053,0	4408,0	9005,0	25368,0	19685,0	24249,0	493,0	24421,5	3600,0	6398,5	24195,0	16009,0
ref S2	B9	23762,0	3548,5	9061,5	17948,5	2909,5	4945,0	24897,0	8724,0	14838,0	160,0	13134,0	3256,0	2894,0	21157,0	7477,0
ref S2	B10	23933,0	3760,0	9429,0	17876,5	2913,0	5150,0	24574,0	9365,0	15710,5	173,0	13062,0	3210,0	3062,0	21860,0	7940,5
ref S3	C9	17019,0	869,0	3003,5	7863,0	911,0	2066,5	15944,0	2121,5	6198,0	56,0	4000,0	1490,5	566,5	7684,0	2641,0
ref S3	C10	17224,5	905,0	3035,0	7823,5	1037,0	2089,0	16238,0	2403,5	6099,0	55,0	4527,0	1493,0	582,5	8745,0	2620,0
ref S4	D9	8518,0	204,0	735,5	1676,0	256,0	684,0	5149,5	434,0	1893,5	31,0	851,0	364,0	81,0	1742,0	755,0
ref S4	D10	8352,0	197,0	690,0	1514,0	260,0	644,0	5032,5	479,5	1843,5	27,0	832,0	292,0	79,0	1827,5	756,0
ref S5	E9	2552,0	61,0	147,5	164,0	61,0	140,0	796,0	154,0	608,5	18,0	107,5	79,0	24,0	286,5	199,0
ref S5	E10	2887,5	75,0	200,5	189,5	75,0	162,0	926,0	161,0	760,0	19,0	153,0	84,0	25,0	296,5	213,0
ref S6	F9	451,0	28,0	71,5	22,0	29,0	48,0	142,0	76,0	439,5	12,0	22,0	52,0	17,5	83,0	54,5
ref S6	F10	447,0	27,0	74,0	25,0	29,0	52,5	163,0	74,0	441,0	15,0	27,0	51,0	17,0	95,0	56,0
ref S7	G9	73,5	22,0	59,0	15,0	23,5	32,0	44,0	60,0	422,5	14,5	16,0	54,0	16,0	50,0	24,0
ref S7	G10	90,0	21,0	60,0	14,0	23,0	35,0	46,0	60,0	430,5	14,0	14,0	51,0	16,0	51,5	26,0
LUMC#1	A11	2603,0	1002,5	17954,0	718,5	9053,0	306,5	6041,0	699,5	3022,0	2374,0	4924,5	638,0	22053,5	24127,0	5579,0
LUMC#2	B11	76,0	3461,0	134,0	1152,0	4468,0	125,0	8350,0	184,0	365,0	86,0	25391,0	2563,0	1003,0	3579,5	157,0
LUMC#3	C11	1165,5	2642,0	17245,5	605,0	9521,5	2284,0	11349,0	3456,0	770,0	405,0	24867,0	1073,0	22453,0	24195,0	1863,0
LUMC#4	D11	402,5	187,0	83,5	67,0	7132,0	345,0	3677,0	679,0	4031,0	2737,0	24035,0	982,0	22230,0	24096,0	139,5
LUMC#5	E11	110,5	8510,0	85,0	118,0	7015,0	91,0	1188,5	160,0	328,0	37,0	24394,0	1084,0	5786,0	20193,5	63,0
LUMC#6	F11	547,0	5166,0	89,5	172,0	6906,0	91,0	4244,0	999,0	1054,0	73,0	24734,5	791,5	20497,0	23519,0	1042,0
spiked 1500	H11	19872,0	178,5	1757,0	8379,0	915,0	1934,5	11661,0	1497,0	4310,5	72,0	2283,5	2265,0	1565,5	10225,5	1327,0
spiked 500	G11	9789,0	53,0	280,5	1017,5	139,0	284,5	2446,0	193,5	1057,0	23,0	45,0	302,5	125,0	975,5	654,0

## Sheet: lab 2- manu II lot A
		GM-CSF (44)	IFNg (43)	TNFa (45)	IL-10 (28)	IL-13 (35)	IL-17a (36)	IL-18 (66)	IL-1b (18)	IL-2 (19)	IL-5 (21)	IL-1a (62)	IL-1RA (38)	IL-8 (27)	IP-10 (22)	MCP-1 (51)	MIP-1a (12)	MIP-1b (47)
Type	Well	FI	FI	FI	FI	FI	FI	FI	FI	FI	FI	FI	FI	FI	FI	FI	FI	FI
S1	A1	---	7793,0	5163,5	20553,0	17333,0	19259,0	12286,5	5874,5	---	---	7431,0	9281,0	4166,0	10677,0	14916,5	---	11485,0
S1	A2	---	7611,5	5146,0	19873,0	19097,5	20543,0	12125,0	5810,0	---	---	6969,0	9031,0	4125,0	9631,0	14262,5	---	11209,0
S2	B1	9451,0	5548,0	3744,0	10725,0	8598,0	9768,0	8995,0	3099,0	3795,0	4227,5	3818,0	6364,5	2134,0	7314,5	10708,0	6999,0	7120,0
S2	B2	11068,5	5911,0	3854,0	11762,0	11583,5	13506,0	9541,0	3363,0	4361,0	4073,0	4193,0	6924,5	2396,0	8065,5	11561,0	7509,0	7955,0
S3	C1	2749,0	2329,0	1364,0	3913,5	2376,0	1970,0	3400,5	1273,0	1109,0	2003,0	1208,0	2045,5	737,5	2210,0	3784,0	3072,5	2001,5
S3	C2	3594,0	2495,5	1416,0	3984,0	3561,0	3301,0	3446,5	1236,0	1361,0	2046,0	1190,5	2193,0	710,0	2382,5	3650,0	3110,5	1914,0
S4	D1	206,0	595,5	269,0	834,0	282,0	299,0	632,5	337,0	101,0	309,5	218,5	316,0	124,5	493,0	429,0	331,5	263,5
S4	D2	285,0	583,0	296,0	873,0	381,0	366,0	625,0	322,0	124,0	287,5	232,0	262,0	121,0	424,5	490,0	356,5	260,5
S5	E1	38,5	171,0	73,0	236,5	54,0	72,5	121,0	90,0	23,5	82,0	83,0	42,0	55,0	94,0	67,5	78,0	51,0
S5	E2	44,0	146,0	61,0	218,0	57,0	82,0	106,5	80,0	19,0	80,0	72,5	32,0	46,0	62,5	48,0	60,0	42,0
S6	F1	14,0	51,0	21,0	68,0	17,0	20,5	36,0	46,0	9,5	35,0	55,0	13,0	43,0	17,0	18,0	32,0	25,0
S6	F2	16,0	56,0	22,0	58,0	18,0	19,0	31,0	39,5	10,5	26,5	44,0	11,0	32,0	13,0	14,0	25,5	23,0
S7	G1	11,0	38,5	12,0	31,0	---	8,0	18,0	37,0	8,0	23,0	---	---	---	8,5	---	23,5	---
S7	G2	11,5	39,0	13,0	31,0	---	7,0	18,0	36,0	10,0	22,0	---	---	---	9,0	---	21,0	---
B	H1	9,0	30,0	9,0	21,0	13,0	5,0	12,0	32,5	9,0	19,0	37,5	8,0	29,0	8,0	11,0	19,0	19,0
B	H2	9,0	36,0	9,0	23,0	12,5	6,0	13,0	34,5	9,5	17,0	39,0	11,0	29,0	8,0	12,0	19,0	22,0
B	H3	8,0	35,5	9,0	19,5	12,0	5,5	12,5	32,0	9,0	17,0	40,0	7,0	27,0	7,5	10,0	16,0	16,0
B	H4	10,0	40,0	9,0	21,0	12,0	5,0	13,0	37,5	11,0	20,0	39,0	9,0	28,0	6,0	11,0	15,0	18,0
ref S1	A3	14936,0	3685,0	3634,0	20454,0	22472,5	21408,0	10270,0	8044,0	3317,5	2614,0	4093,0	7691,0	3755,0	9573,5	14404,5	5133,0	11038,0
ref S1	A4	13702,0	3265,0	3266,5	18983,0	20310,0	19267,0	9150,0	7361,0	2961,5	2234,5	3323,0	7021,0	3156,5	8680,0	13172,0	4655,0	9924,0
ref S2	B3	10294,0	2876,0	2209,5	13930,5	17258,0	13470,0	8669,5	6362,0	1407,0	1934,0	3853,5	5258,0	2333,0	5391,0	14670,5	2768,0	9873,0
ref S2	B4	10496,0	2938,0	2528,0	14412,0	17836,0	13837,0	8585,0	6231,0	1571,0	1987,5	4028,0	5350,5	2457,0	5601,0	14431,0	3085,0	10042,0
ref S3	C3	4895,0	1625,0	976,0	7379,0	10121,0	3765,0	4510,0	4077,0	306,5	1060,0	2801,0	1233,0	958,0	1214,5	12002,0	790,5	3745,0
ref S3	C4	4292,0	1687,0	901,0	6825,0	9351,0	3407,0	4285,0	3877,0	261,5	1024,0	2897,5	1225,0	927,0	1235,0	12112,5	769,0	3965,0
ref S4	D3	646,0	547,0	238,5	2348,0	2746,0	214,0	1291,0	1946,5	29,0	258,0	1006,0	63,0	219,5	57,0	4564,0	159,5	92,0
ref S4	D4	634,5	594,5	221,5	2281,0	2787,0	250,0	1269,0	1908,0	23,0	268,5	1020,0	67,0	237,0	60,0	4641,5	177,0	94,5
ref S5	E3	37,0	156,0	61,5	475,0	263,0	36,5	311,5	802,0	11,0	65,5	275,0	16,0	51,0	17,0	560,0	43,0	35,0
ref S5	E4	33,0	139,0	51,0	362,0	223,0	30,0	268,5	738,0	10,0	52,0	219,0	15,0	42,5	10,0	382,0	34,0	28,0
ref S6	F3	10,0	49,0	15,0	48,0	32,0	11,0	43,0	183,0	8,0	22,0	52,5	8,0	29,0	6,0	13,0	16,5	19,0
ref S6	F4	12,0	48,0	14,0	50,0	38,0	11,0	54,0	210,0	9,0	22,0	49,0	8,0	28,0	8,0	13,5	18,0	20,5
ref S7	G3	9,0	32,0	8,5	28,0	18,0	8,0	16,0	43,0	7,0	18,0	37,0	8,0	25,0	5,0	11,0	16,0	17,0
ref S7	G4	9,0	33,0	10,0	28,0	19,0	6,0	16,0	45,5	9,0	21,0	41,0	8,5	27,0	8,0	12,0	16,0	17,5
LUMC#1	A5	3043,0	1695,0	953,0	1167,0	2860,0	1299,5	118,0	641,5	3638,0	119,0	53,0	832,0	1236,0	1480,0	9587,0	6147,0	8059,5
LUMC#2	B5	32,0	387,5	44,0	309,0	5443,5	171,0	94,5	41,5	17,5	167,0	172,0	9619,0	3802,0	11838,0	11688,0	1087,0	942,5
LUMC#3	C5	602,0	1342,0	443,0	7865,5	8002,0	10258,0	178,5	483,5	3553,0	136,5	348,0	7084,0	1007,0	9567,0	9926,0	7437,0	11393,0
LUMC#4	D5	2731,0	2643,0	58,0	878,5	2137,0	1294,0	151,0	124,5	11,0	34,0	212,0	5154,0	4027,0	7990,0	11729,5	6777,0	12345,0
LUMC#5	E5	48,0	54,0	20,0	241,0	1325,0	67,5	34,0	55,0	16,0	33,0	128,0	6436,0	2530,0	8688,0	7915,0	3348,0	6376,0
LUMC#6	F5	294,0	210,0	86,5	259,0	3642,0	2355,5	97,0	238,0	16,5	40,0	191,5	6903,0	1689,0	9382,5	7731,5	5579,5	10106,0
spiked 1500	H5	4119,0	1273,0	388,0	6142,0	8316,5	2386,0	3554,0	3840,0	179,5	904,0	2260,0	715,0	729,0	669,5	12928,0	997,0	7203,0
spiked 500	G5	330,0	329,5	191,5	984,0	1291,0	66,0	995,5	2057,0	14,0	183,5	1393,0	34,0	98,5	10,0	4797,5	141,0	71,0
S1	A7	12650,0	6554,0	4036,0	16216,0	20237,0	20701,5	11701,0	3996,0	4339,0	4669,0	6099,0	6936,0	2938,0	7448,0	13021,0	6416,5	8352,0
S1	A8	12925,0	6672,0	3929,0	17374,5	20349,0	21027,0	11659,5	4173,0	4228,5	4801,0	6061,0	7103,5	3016,0	7746,0	12833,0	6472,5	8731,0
S2	B7	8475,0	5038,0	3146,0	8985,5	11112,0	12246,5	8827,0	2144,0	2687,0	4414,5	3381,0	4979,0	1867,0	6264,5	9828,0	5166,0	5595,0
S2	B8	8132,0	4841,0	2870,5	8336,0	11012,0	11779,0	8390,0	1985,0	2564,0	4041,0	3052,0	4884,0	1765,0	5817,0	9291,0	4866,0	5251,0
S3	C7	2172,0	1813,0	1034,5	2422,0	2673,5	2072,0	2793,5	689,0	729,0	2066,5	806,0	1386,0	493,0	1486,5	2497,0	1725,0	1013,0
S3	C8	2215,0	1831,5	1032,0	2469,0	2725,0	2007,0	2878,0	761,0	698,0	2086,0	849,5	1365,5	498,0	1461,0	2463,5	1812,0	984,0
S4	D7	141,0	350,0	196,0	428,0	190,0	193,0	452,0	170,0	61,0	234,0	148,0	163,0	83,0	243,0	270,0	171,0	130,0
S4	D8	151,0	349,0	201,0	470,0	206,0	200,0	450,0	195,5	66,0	237,5	176,5	159,0	91,0	251,5	276,0	178,5	135,5
S5	E7	25,0	94,5	47,0	91,0	39,5	41,0	68,0	54,0	12,5	54,5	55,5	23,0	36,5	35,0	32,0	32,0	29,0
S5	E8	22,0	95,0	44,0	97,5	35,0	41,0	70,0	51,0	11,0	53,0	52,0	23,0	36,0	39,0	30,0	32,0	25,0
S6	F7	13,0	43,0	16,0	30,0	17,0	12,0	24,5	33,0	9,0	25,0	41,0	9,0	28,0	13,0	13,0	15,0	17,0
S6	F8	11,0	43,0	15,0	27,0	15,0	10,5	24,5	33,0	7,0	24,0	38,0	9,0	30,5	12,0	13,0	13,0	15,0
S7	G7	10,0	36,0	11,0	15,0	14,0	6,0	15,0	31,0	7,0	18,0	35,0	8,0	25,5	8,0	11,0	13,0	14,5
S7	G8	9,0	39,0	10,0	16,0	12,5	6,5	14,0	29,0	8,0	20,5	36,0	9,0	29,5	9,5	12,0	13,0	15,0
B	H7	10,0	35,0	8,0	12,0	13,5	4,0	13,0	29,0	8,0	17,0	35,0	8,0	28,0	8,0	10,5	10,0	13,5
B	H8	8,0	34,0	9,0	11,0	13,0	5,0	15,0	29,0	8,0	16,5	34,5	8,0	28,0	9,0	9,5	12,0	16,0
B	H9	9,0	35,0	7,0	12,0	13,0	5,0	13,0	26,0	9,0	17,0	34,5	8,0	31,0	8,0	10,5	12,0	15,0
B	H10	8,0	34,0	6,0	10,0	11,0	3,0	14,0	26,0	8,5	16,0	34,5	7,0	26,0	9,0	10,0	10,0	14,0
ref S1	A9	11640,0	2885,0	2484,0	17979,5	23598,5	20375,0	9193,5	6279,5	1823,0	2403,0	3367,0	5723,0	2594,0	7031,5	12089,0	3191,0	8147,0
ref S1	A10	12011,5	2959,0	2617,0	18519,0	23949,0	21665,0	9828,0	6494,0	1898,5	2499,0	3625,0	5953,0	2627,5	7179,0	12938,0	3166,0	8140,5
ref S2	B9	7815,0	2373,5	1593,5	11273,0	18242,5	12982,0	7605,0	4404,0	773,0	1956,0	3309,5	3876,0	1737,0	4066,0	13359,0	1605,0	7021,0
ref S2	B10	7671,0	2462,5	1529,0	11168,0	18165,0	12344,0	7593,0	4335,0	729,0	1929,5	3500,5	3763,0	1689,0	3681,0	13037,0	1578,5	7019,0
ref S3	C9	2921,5	1132,0	582,0	4762,0	9417,5	2306,0	3543,5	2387,0	165,5	968,0	2340,5	885,0	639,5	857,0	10517,0	401,0	2771,0
ref S3	C10	2618,0	1094,0	570,5	4220,0	9179,5	2003,0	3235,0	2321,0	150,0	891,0	2163,0	824,0	590,0	873,0	9886,0	378,5	2307,0
ref S4	D9	413,0	376,0	187,0	1419,5	2462,0	173,0	1055,5	1151,0	23,0	260,0	849,5	58,5	179,0	62,0	3740,0	101,0	72,0
ref S4	D10	308,5	350,0	153,0	1232,0	1890,0	140,0	856,0	1099,0	20,0	215,0	787,0	49,0	152,5	50,0	3045,0	93,0	70,0
ref S5	E9	35,0	104,0	53,5	241,0	279,0	65,0	209,0	395,0	9,0	59,0	213,0	18,0	48,0	18,0	538,0	31,5	30,0
ref S5	E10	24,0	99,0	45,5	201,0	191,5	25,0	177,0	378,0	9,0	50,0	191,0	14,0	38,0	13,5	338,0	22,0	23,0
ref S6	F9	10,5	45,0	14,0	29,0	32,0	9,0	48,0	119,5	8,0	20,0	51,5	9,0	30,0	9,0	18,0	12,0	14,0
ref S6	F10	11,0	46,0	14,0	29,0	33,0	8,5	42,0	110,5	7,0	20,0	48,0	8,0	31,0	8,0	16,0	12,5	14,0
ref S7	G9	10,0	40,0	10,0	21,0	19,0	8,5	16,0	44,0	8,0	18,0	46,0	8,0	29,0	8,0	20,0	12,5	16,0
ref S7	G10	10,0	35,0	10,0	17,0	15,0	5,0	17,0	38,0	8,0	17,0	37,0	8,0	27,0	8,0	14,0	12,0	14,0
LUMC#1	A11	1647,5	1639,5	630,0	646,0	2804,0	649,0	111,5	475,0	2072,0	108,0	56,0	716,0	1639,0	1230,5	10130,0	4133,5	8437,0
LUMC#2	B11	20,0	243,0	33,0	145,0	4439,0	91,0	87,0	30,0	11,0	147,0	124,0	7679,5	2645,5	9377,5	9145,0	542,0	490,0
LUMC#3	C11	259,0	875,0	242,5	4663,0	7027,0	6804,0	181,0	255,0	1819,0	104,0	208,5	5461,5	729,0	7762,0	8293,0	4793,0	9009,0
LUMC#4	D11	1675,5	1952,0	48,0	544,0	1680,0	725,0	105,0	80,0	9,0	29,0	146,5	3753,5	3032,0	6134,0	10201,0	4514,0	10596,5
LUMC#5	E11	27,0	49,0	16,0	120,0	809,0	46,0	32,0	38,5	9,0	27,0	82,0	4769,0	1777,0	6712,0	6043,5	1845,0	3980,5
LUMC#6	F11	161,0	145,0	65,0	122,0	2727,0	1259,5	79,0	113,0	9,0	36,0	120,0	5271,5	1214,0	7546,0	5898,0	3553,0	7716,0
spiked 1500	H11	2127,5	800,5	271,0	3678,5	6718,0	986,0	2677,0	2244,0	80,0	906,0	2196,0	322,5	468,5	283,5	11663,0	525,5	4510,5
spiked 500	G11	164,5	184,5	117,0	495,0	782,0	54,0	593,5	984,0	9,0	159,0	909,0	22,0	71,0	9,0	3146,0	82,0	56,0

## Sheet: lab 2- manu II lot B
		GM-CSF (44)	IFNg (43)	TNFa (45)	IL-10 (28)	IL-13 (35)	IL-17a (36)	IL-18 (66)	IL-1b (18)	IL-2 (19)	IL-5 (21)	IL-1a (62)	IL-1RA (38)	IL-8 (27)	IP-10 (22)	MCP-1 (51)	MIP-1a (12)	MIP-1b (47)
Type	Well	FI	FI	FI	FI	FI	FI	FI	FI	FI	FI	FI	FI	FI	FI	FI	FI	FI
S1	A1	10342	4142	5702	20703	11974	17402	6960	1751	6671	3791.5	9478	4043	7702	5621	8259	9261	10172
S1	A2	12302.5	4979	7468.5	23578	14145	20845	8355	2158	8086.5	4661	11488	5036	9726	6718	10114	11071.5	12595.5
S2	B1	6809.5	2808	3781	12290	5734	9587	5727	783	4841	3352	5390	2425.5	4565	4371.5	5546	7434	6362
S2	B2	8022	3482	4686	14319	7158.5	11475	6952	1004	5878	4276.5	6492	2906.5	5504	5479	7037	8754	7677
S3	C1	2236.5	1168	1895.5	5889.5	1627	2448	2805	335	1859	1773.5	2148	782	1749	1262	1571	3815.5	2729
S3	C2	2292.5	1203	1878	5766.5	1730	2496.5	2923	353	1913.5	1957.5	2163	818	1794	1348.5	1719	3941.5	2868
S4	D1	108.5	258	325	1187	107	256	531	75	115	212.5	376	82	232.5	197.5	138	380	453
S4	D2	103	259	335	1188	107	240	506	78	115.5	218.5	369	77	231	200.5	147	406.5	458
S5	E1	16	71.5	76.5	301	22	61	88.5	13	17	64	80	14	63	25	17	65	68.5
S5	E2	18	65	63	243	20	59	78	14.5	16	60	72	12	56	25.5	16.5	57	64
S6	F1	8	19	21	66	8	19	25.5	6	7	26	24.5	7	28	5	7	25	21
S6	F2	8	19	21	63	9	18	23.5	8	8	25	23	6	27	5	6	25	22
S7	G1	5	9	9	22	7	11	12	5	6	17	14	5	17	4	5	15	12
S7	G2	6	8	10	22	7	12	13.5	6	7	19.5	16	5	20	4	6	15	14
B	H1	5	7	7	9	6	8	10	5	6	20	12	5	20.5	3	6	13	11
B	H2	4	6	6	10	7	8	9	5	6	19	12	5	19	4	5	12	12
B	H3	3.5	6	7	8	6	9	10	5	7	18	11	5	17	3	5	12	11
B	H4	4	6	7	9	6	8	9	5	6	17	10	4	16.5	3	5	12	11
ref S1	A3	11587.5	861	6910	23161	17837	20541.5	6696.5	3108.5	4930	2334.5	5823	3556.5	8784	6220	10016	6367	9215.5
ref S1	A4	11529	896	7004	22597	18110	20719	6750	3089	5058.5	2357.5	6084	3603	8563	6120	10011	6505.5	9246
ref S2	B3	8074	727	4410	16406.5	14356	12585	5932	2446	2399	1840.5	5568	1933.5	5742	4236	10428	3611	7047.5
ref S2	B4	7918	658	4323.5	15758	13450	12059	5808	2275.5	2280	1650	5180	1924	5489	3998	9644.5	3390	7050.5
ref S3	C3	4065	408.5	2337.5	9558	8938	5028	3748	1485	710.5	1024	4727.5	698	2837	1885	8670.5	1493	5206
ref S3	C4	4027	384.5	2288	9521	8770	5247	3731	1384	692	983	4534	682	2795	1836.5	8523.5	1435	5160
ref S4	D3	1157	158.5	970	4758	4082.5	1498	1532	705.5	135.5	385	2518	180	1130	611	3971	578	2585
ref S4	D4	1067	136	960	4249	3934.5	1502	1406	651.5	133.5	371	2124	163	1062	594	3638	560	2474.5
ref S5	E3	248.5	60	411.5	1918	1531	407	565	337	30	131	990	43	435.5	182	1451	262	905.5
ref S5	E4	264	58.5	405	1953	1540.5	423	542.5	326.5	27	131	880	32	435.5	183	1436	268	911
ref S6	F3	58	24	157	703.5	486	142	187	137	15	54	351	12	174	49	518	117	356
ref S6	F4	50	20.5	137	683	383	128	167	117	9.5	55	313	10	153	42	408	90	310.5
ref S7	G3	21	11	50	229.5	104	48	67.5	55.5	8	32.5	140	7	74	10	153	44	125
ref S7	G4	21	12	54	267	119	53	71	61	8	30.5	140	6	73	10	159	43	125
LUMC#1	A5	2591	1673	1291	1922	2516	1591	327	172	5343	99	57	622.5	7979	609.5	6379	9299	11084
LUMC#2	B5	18	402	766	588	4341	182	184.5	6	12	172	78.5	2832	9189	7197	9190	1612.5	4423
LUMC#3	C5	331	1305	1527	9970	5990.5	9570	259	100	5147	121.5	577	2131	8984	6545.5	9294	10177	13553
LUMC#4	D5	2058.5	2635.5	378	1493.5	1379	1211	511	27	8	34	348	245	10408	5159.5	8641.5	10036	14133.5
LUMC#5	E5	24	29	181	348.5	698	64	44	17	11	27	57	2090	9605	4943	6131	3839.5	6252
LUMC#6	F5	169	139	647	277.5	2336	2033	101	34	11.5	32	180	1141	9113	5459	5686	8216	11374
spiked 1500	H5	407.5	66	562	1840	1767	387	687	571	25	249	2163	89	352	19.5	3387	398	1327.5
spiked 500	G5	3913	441	2048	10060.5	8064	4261	3171	1442	479	1135	5001	748.5	2397	897	10040	1710.5	5954
S1	A7	10002	4326	7617	21945	15359	20876	8189	1551	5909	4796	10401	3241	8132	5407	8958	8561.5	11454
S1	A8	10935	4461.5	7072	23305.5	15719	22292	8903	1638.5	6085	5012.5	10894	3357	8475	5781	9253	8914	12472.5
S2	B7	5676.5	2676	3908	10708	6517	9838	6340	693	3687	4072	5845	1724	4524	4192	5542	6204.5	5705
S2	B8	5990	2937	4216	11630	7008.5	10329	6613.5	764	3982	4290	6149	1880.5	4807.5	4561.5	6003.5	6420	6341
S3	C7	1310.5	888	1561	3735	1228	1398	2271.5	225	1049	1858	1664	427	1263	1003	1234	2378.5	1854
S3	C8	1365	921	1572	3912	1272	1435.5	2354.5	227	1038	2033	1653	438	1212	1010	1271	2379	1841.5
S4	D7	72	179	294	708	78	146	388	47	69	187	279.5	48	160	161	122	257	305.5
S4	D8	65	172.5	277.5	681	72	130	366	48	62	184	251.5	44	164	145.5	121	240	282
S5	E7	11	42.5	53	136	16	35	57	11	12	45	45	8.5	39	20.5	12	32	41
S5	E8	11	51	57	147	15	39	59	11	12	47	49	9	40	23	12	36	44
S6	F7	6	14	16	37	8	14	19	6	5	21	18	6	21	4	6	13	14
S6	F8	5	14	17.5	38	8	16	20	6	6	21	19	5	20	4	5	15	15
S7	G7	5	7	9	15	7	9	12	6	6	17	13	5	17	4	5	11	11
S7	G8	5	8	8	15	6	10	13	5	6	16	12	5	17	4	5	10	11
B	H7	5	5.5	6	8	6	9	11	5	6	16	12	5	16	3	4	9	10
B	H8	4	6	6	8	6	8	11	5	5	15.5	11	5	15	3	5	9	9
B	H9	4	6	6	8	6	9	10	5	6	15	13	4	15	4	5	9	10
B	H10	4	8	8	8	9	9	12	5	6	17	22	7	44	6	9	10	19
ref S1	A9	9852	779	7184	22862	20368	22492	6326	2236	3222	2482	7323	2464	7767	5499.5	9075.5	4573.5	8220.5
ref S1	A10	9814	709	6805	23551	19987	21258.5	6547.5	2301	3231	2496	7149.5	2427	7605	5285	9073	4527.5	8172.5
ref S2	B9	6021	564	4025	14149	14635.5	10980	5706	1705	1298	1815	6463	1228	4763	3191	8987	2201	5971
ref S2	B10	6069	531	4264	15074	14752	9858	5694	1602	1360	1876	6462	1274	4640	3082	9102.5	2264	6083
ref S3	C9	2431.5	268	2016	6944	8202	3175	2995.5	943.5	353	994.5	5165	395	2032	1323	7294.5	777.5	3801
ref S3	C10	2586.5	236	2426	7539.5	8292	2921.5	2874	954	383	994	4926	391	2048	1103	7379.5	848	4026
ref S4	D9	657	104	893	2913.5	3588.5	841	1222	436	81.5	366	2366.5	95.5	718	434.5	2941	316.5	1817
ref S4	D10	624	89	986	3108	3097	708	961.5	448	78	346.5	2405	93	682	351	2770	320	1913
ref S5	E9	124.5	36	388.5	982	1012.5	222	363	182.5	19	104	768	19	229	107	870.5	128	557
ref S5	E10	145	32	366.5	1244.5	976	235	322	195.5	22	123	859	27	263	104.5	901	148.5	687
ref S6	F9	36	14.5	108	391.5	261.5	83	128.5	78.5	9	47	310	9	99	29	301	56	211
ref S6	F10	40	17	112.5	444	243.5	79	97	77	9.5	47	292.5	11.5	122.5	29	281	60	236
ref S7	G9	14	10	44.5	145	75	39	53	37	7	26	132	7	51	9	118	32	92.5
ref S7	G10	18	11	46	167	92.5	39	42	36	7	29	147	9	82	12	121	36	116
LUMC#1	A11	1370	1431	1109	964	2019	723.5	347	110	3598	88	46	432.5	9014.5	566	6229	7517	12297.5
LUMC#2	B11	12	240	750	270	3190	98	137	6	11	159	52	1775.5	7141	5894.5	7489.5	833	2737
LUMC#3	C11	165	826	1093	7084.5	4945	7015	285	63	3126	99	338	1244.5	9031	5450.5	7897.5	7532	13180
LUMC#4	D11	1386	2069	459	1063.5	1191	848.5	398	22	7	32	251	173	9380	4769.5	7146.5	7986	15614
LUMC#5	E11	15	21	141	190	443	45	36	12	7	25	36	1286	9200	4371	4976	2313	5085
LUMC#6	F11	95	94	448	150	1757.5	1043	79.5	20	7	32.5	110	705	8631	4763.5	4158	6108	11486
spiked 1500	H11	138	40	351	748	930	154	450.5	342.5	12	172	1908	49	172	11	1945	192	626
spiked 500	G11	2507	270	2180	7331.5	7795	2477	2446	896	260	1179.5	5179	356.5	1546	756	8964	913	4110.5

## Sheet: lab 2- manu II lot C
		GM-CSF (44)	IFNg (43)	TNFa (45)	IL-10 (28)	IL-13 (35)	IL-17a (36)	IL-18 (66)	IL-1b (18)	IL-2 (19)	IL-5 (21)	IL-1a (62)	IL-1RA (38)	IL-8 (27)	IP-10 (22)	MCP-1 (51)	MIP-1a (12)	MIP-1b (47)
Type	Well	FI	FI	FI	FI	FI	FI	FI	FI	FI	FI	FI	FI	FI	FI	FI	FI	FI
S1	A1	13759,0	4848,0	6095,5	9843,5	19215,5	7134,5	9299,0	3881,0	5135,0	---	8406,0	2489,0	3490,0	3663,0	13102,0	---	8014,0
S1	A2	14309,0	5495,0	6410,0	10289,0	20505,0	7501,0	9795,0	3976,0	5482,5	---	9180,0	2536,5	3592,0	3998,0	13655,0	---	8473,5
S2	B1	7482,0	3727,0	4330,0	4139,0	9299,0	2570,5	6397,0	1883,5	3287,0	5371,0	5116,0	1737,0	1829,0	2056,0	6340,5	6053,0	4503,0
S2	B2	7897,0	3914,0	4830,0	4640,0	9900,0	2905,0	7382,0	2024,0	3589,0	5619,0	5453,5	1803,0	2078,0	2646,0	7617,5	6322,0	4929,0
S3	C1	1722,0	1446,0	1572,0	1190,0	2298,0	417,0	2290,0	719,5	1054,0	2025,0	1634,0	701,0	670,0	543,0	1100,0	2566,0	1786,0
S3	C2	1776,0	1518,0	1636,0	1278,0	2228,0	423,0	2441,5	711,0	1014,5	2069,0	1607,5	724,0	696,0	547,5	1167,5	2515,0	1733,0
S4	D1	249,0	364,0	368,0	266,0	387,0	75,0	480,0	182,0	127,0	319,0	353,0	163,0	194,0	148,0	160,0	441,0	471,0
S4	D2	217,0	329,0	352,0	246,0	290,0	60,0	484,0	178,5	93,5	255,0	356,0	158,0	181,0	128,0	146,0	381,0	451,0
S5	E1	63,0	101,0	93,0	69,0	95,5	24,0	111,5	43,0	25,0	88,0	132,5	50,0	103,0	50,0	49,0	90,0	146,5
S5	E2	45,0	91,0	68,0	55,0	68,0	20,0	94,5	33,0	20,0	68,0	104,5	44,0	95,0	39,5	39,0	65,5	126,0
S6	F1	24,0	46,5	34,0	29,0	33,0	12,0	57,0	21,0	12,0	44,0	93,0	36,0	88,0	31,0	36,0	37,5	94,0
S6	F2	19,0	39,0	27,0	26,0	27,0	11,0	56,0	18,0	12,0	36,0	81,0	32,0	85,5	29,0	30,0	32,0	86,0
S7	G1	---	26,0	17,0	---	---	9,0	---	---	---	28,0	---	---	---	---	---	24,0	---
S7	G2	---	28,0	18,0	---	---	11,5	---	---	---	29,0	---	---	---	---	---	24,0	---
B	H1	10,0	19,0	12,0	14,5	11,0	7,5	35,0	12,0	10,0	25,0	66,0	24,0	74,0	25,5	26,0	19,0	72,0
B	H2	10,0	21,5	12,0	15,0	13,5	9,0	37,0	11,5	10,0	26,0	71,0	31,0	77,0	22,5	28,0	18,0	74,0
B	H3	11,0	19,0	11,0	13,0	13,0	8,0	35,0	11,0	10,0	25,0	65,0	27,0	74,0	22,0	22,5	18,0	66,0
B	H4	11,0	22,0	13,0	12,0	13,0	10,0	33,0	11,0	8,0	26,0	66,5	25,0	71,0	20,0	23,0	17,0	69,0
ref S1	A3	12313,0	1114,5	3663,0	10892,5	24259,5	6919,0	7823,0	5827,5	2868,5	3185,0	7440,0	2096,0	3140,0	3362,0	13429,5	3877,0	4955,5
ref S1	A4	11576,5	1151,0	3538,0	10883,0	23841,5	6803,5	7942,0	5445,0	2746,0	3108,5	7330,0	1987,0	3155,5	3341,0	12900,0	3820,5	4948,0
ref S2	B3	6987,0	704,0	1687,5	6273,0	18283,0	2614,0	5864,0	3793,5	1231,0	2153,0	6555,0	1325,0	1784,0	1254,5	12976,0	1902,0	3631,0
ref S2	B4	7319,0	754,0	1837,0	6735,0	18629,0	2632,5	6190,5	4013,0	1360,0	2302,0	7027,0	1409,0	2027,0	1352,5	13720,0	1997,0	4067,0
ref S3	C3	2450,0	358,0	699,0	2804,0	9172,5	610,0	2849,5	2152,0	324,0	1055,0	4965,0	638,0	850,5	387,0	8413,0	808,0	2617,0
ref S3	C4	2331,0	380,5	687,0	2826,0	8927,0	514,0	2983,0	2280,0	307,0	1033,0	5102,0	668,0	874,0	340,5	8479,0	800,0	2444,0
ref S4	D3	529,0	131,5	221,0	862,0	3062,0	102,0	915,0	1125,0	57,0	295,0	2004,0	212,5	322,0	82,5	1819,5	298,5	1089,5
ref S4	D4	493,5	141,0	223,0	876,0	3133,0	101,0	939,0	1128,5	51,5	297,0	1982,0	218,0	322,0	78,0	1861,0	313,5	1009,0
ref S5	E3	75,0	48,0	61,5	173,5	605,0	27,0	233,0	407,0	15,0	84,0	521,0	70,0	107,0	33,0	177,5	74,0	228,0
ref S5	E4	79,5	51,0	69,5	198,0	670,0	33,0	258,0	450,5	14,0	84,0	561,0	76,0	120,5	33,0	230,5	86,0	244,0
ref S6	F3	24,5	26,0	21,5	49,0	160,0	13,0	73,0	114,5	11,0	37,0	130,0	34,0	82,0	24,0	43,0	25,0	84,5
ref S6	F4	26,0	30,0	23,0	55,0	186,0	16,0	83,0	125,0	9,0	39,0	144,0	37,0	87,0	27,0	54,0	27,0	104,0
ref S7	G3	14,0	21,0	14,0	24,0	55,0	11,0	40,0	25,0	10,0	29,0	82,0	25,5	80,0	24,0	30,0	19,0	76,5
ref S7	G4	14,0	24,0	16,0	23,0	54,0	10,0	42,0	27,0	9,0	26,0	77,5	28,0	75,5	21,0	27,0	18,0	73,0
LUMC#1	A5	1910,0	2407,0	1087,5	384,0	5218,5	359,0	212,5	550,0	3571,0	174,0	102,0	861,0	2887,0	794,0	10645,0	6799,0	8730,5
LUMC#2	B5	52,0	369,0	76,0	209,0	7303,0	69,0	124,5	17,5	20,0	246,5	108,0	1883,0	3597,5	3573,0	13798,5	1224,0	3162,0
LUMC#3	C5	384,5	1145,0	345,0	3629,0	9258,0	2696,0	152,5	245,0	2969,0	149,0	221,0	1425,0	2131,0	3873,0	12360,0	6815,0	8983,0
LUMC#4	D5	1706,0	2665,0	46,5	606,0	3019,0	349,5	227,5	70,0	13,0	47,0	174,0	359,0	3824,5	3572,0	11786,0	7257,5	10482,0
LUMC#5	E5	56,0	33,0	15,0	53,0	924,5	17,0	70,0	18,0	12,0	32,5	67,0	1060,0	3492,0	3574,0	7907,0	1970,0	3486,0
LUMC#6	F5	258,0	93,0	40,0	57,0	2917,0	284,0	85,0	49,0	14,0	36,0	88,5	717,0	3275,0	4410,5	7612,0	5859,0	8265,5
spiked 1500	H5	2081,0	192,5	539,0	1854,0	7295,0	357,5	1374,0	1911,0	148,0	1029,5	4903,0	552,0	568,0	119,0	8709,0	808,0	2745,0
spiked 500	G5	247,5	54,0	164,0	171,0	1383,0	37,0	354,0	928,0	18,0	213,5	2098,5	114,0	155,5	27,0	1939,0	247,0	832,0
S1	A7	16424,5	7528,0	8129,5	14653,5	20496,0	10480,5	12215,0	6332,0	7752,5	7074,0	12043,0	4226,0	6298,0	6880,5	16117,0	11361,0	11528,5
S1	A8	16253,0	7738,0	8305,0	14719,0	20319,0	10654,5	12362,0	6368,0	7864,0	6946,5	12001,0	4368,0	6485,0	7079,5	16405,0	11484,0	11584,0
S2	B7	10679,0	6003,0	6868,0	8456,0	10259,0	4917,0	10590,5	3611,0	5822,0	6261,0	8668,5	3115,0	3696,0	5283,0	11595,0	9213,5	7623,5
S2	B8	10656,0	6092,5	6757,0	8494,0	10090,0	4733,0	10506,0	3518,0	5784,0	6089,5	8643,0	3080,0	3842,0	5273,5	11905,0	9192,0	7696,0
S3	C7	3256,5	2716,0	2965,0	2857,5	3081,5	870,0	4596,0	1468,0	2141,0	2924,0	3661,0	1264,0	1461,5	1366,5	3142,0	4830,0	3474,0
S3	C8	3238,0	2503,5	3010,0	2761,0	3085,5	887,0	4517,5	1396,0	2089,0	2802,5	3558,0	1309,5	1409,0	1310,5	3215,0	4738,0	3287,5
S4	D7	398,5	656,0	588,0	561,0	479,0	103,0	932,0	370,0	165,0	403,0	799,5	264,0	326,0	264,0	342,0	767,5	794,5
S4	D8	380,0	638,0	598,0	537,0	427,5	92,0	883,0	338,0	159,0	387,0	793,0	266,0	294,5	281,5	370,0	816,5	807,0
S5	E7	71,5	168,0	115,5	115,0	95,0	30,0	158,0	56,0	28,0	90,0	210,0	75,0	134,0	60,0	51,0	108,0	203,0
S5	E8	63,0	158,0	101,0	104,0	85,0	26,0	150,5	52,0	24,0	88,0	203,0	62,0	127,0	60,0	50,0	109,0	179,0
S6	F7	22,0	54,0	30,0	38,5	27,0	17,0	71,0	18,5	10,0	42,0	131,0	39,0	110,0	30,0	30,0	39,0	114,0
S6	F8	20,0	58,0	34,0	42,0	28,0	14,0	70,5	17,0	15,0	41,0	127,0	42,0	107,0	25,5	28,0	45,0	109,0
S7	G7	12,0	32,0	15,0	20,0	17,0	10,0	46,0	12,0	9,0	27,0	112,5	34,0	98,0	20,5	26,0	24,5	95,0
S7	G8	12,0	30,0	18,0	24,5	17,5	10,0	46,0	11,0	10,5	28,0	125,5	37,0	94,0	23,0	27,0	26,5	88,0
B	H7	11,0	23,0	10,0	17,0	13,0	9,0	39,0	9,0	8,0	25,0	114,0	35,0	100,0	25,0	21,0	26,5	95,0
B	H8	9,0	24,5	9,0	18,0	14,5	8,5	39,0	10,0	11,0	27,0	136,0	36,0	105,0	22,0	24,0	27,0	105,0
B	H9	10,0	26,0	12,0	15,0	12,0	9,0	33,5	7,0	9,0	28,0	116,5	32,5	92,5	18,0	20,0	23,0	77,0
B	H10	11,0	24,0	10,0	18,0	13,0	8,0	42,5	8,5	10,0	25,0	106,0	36,0	96,0	17,0	19,0	23,0	91,0
ref S1	A9	15140,0	2235,5	5708,5	15052,0	24158,0	9241,0	10863,0	8711,0	5039,0	4167,5	10357,0	3754,0	5686,0	5450,5	16222,5	6506,5	7443,5
ref S1	A10	14949,0	2242,0	5850,5	15694,5	24014,0	9474,0	11203,5	8771,5	5416,0	4177,0	10683,0	3791,0	6173,0	5570,0	16727,0	6811,0	7713,5
ref S2	B9	9710,0	1495,5	3313,0	10798,0	18906,5	4467,0	8919,0	6534,5	2550,0	2830,0	9796,5	2468,0	3584,0	2769,0	16099,5	3794,0	5854,0
ref S2	B10	10540,0	1633,0	3528,0	11179,0	20252,0	4892,0	9610,0	6726,0	2660,5	2956,0	9868,0	2621,5	3903,0	3037,0	16641,0	4105,0	6125,0
ref S3	C9	3550,0	700,0	1255,5	4656,0	9100,0	796,0	4899,5	4001,0	510,0	1312,0	7656,0	1200,5	1473,0	681,0	11477,0	1450,0	3759,0
ref S3	C10	4379,0	849,0	1420,5	5844,5	10600,5	1376,5	5826,0	4499,0	695,5	1512,0	8305,0	1258,0	1818,0	1029,0	12880,0	1807,0	4281,0
ref S4	D9	607,0	314,0	366,0	1513,0	3176,5	130,0	1864,0	2142,0	61,5	391,0	3611,0	377,0	472,0	122,5	3154,0	553,0	1482,0
ref S4	D10	1009,0	288,5	452,0	2004,5	4187,0	229,0	2098,5	2377,0	105,0	501,5	4301,0	406,0	616,0	202,0	4586,0	681,5	1931,0
ref S5	E9	88,0	85,0	83,0	290,0	717,0	32,0	384,0	804,5	13,0	86,0	916,0	89,0	140,0	37,5	313,0	109,0	323,0
ref S5	E10	142,0	107,0	119,5	511,0	1140,5	50,0	549,0	1018,0	20,0	128,0	1337,0	125,0	179,5	51,0	706,5	175,5	538,0
ref S6	F9	27,0	37,0	25,0	86,0	205,0	18,5	91,0	173,0	11,0	42,5	223,0	52,0	112,0	23,0	54,0	32,0	125,0
ref S6	F10	32,0	38,0	29,0	94,0	219,5	18,5	109,0	220,5	11,0	41,0	249,0	45,5	107,0	27,0	67,0	40,0	144,0
ref S7	G9	15,0	29,0	15,0	44,0	78,5	12,0	63,5	50,0	10,0	31,0	149,0	38,0	101,5	24,0	35,0	31,0	99,5
ref S7	G10	14,0	27,0	16,0	42,0	70,0	12,0	51,0	46,0	9,5	31,0	138,0	34,0	105,0	18,0	32,0	28,0	104,5
LUMC#1	A11	3406,0	3571,5	1950,5	874,0	6180,0	658,0	218,5	1113,5	5959,0	220,0	151,0	1369,5	2874,0	1239,0	9808,5	10048,5	8524,0
LUMC#2	B11	76,5	739,0	104,0	475,0	8599,0	113,0	173,0	20,5	26,0	345,5	253,0	3252,5	6498,0	7156,0	16962,0	2412,0	5151,0
LUMC#3	C11	764,0	2278,0	632,0	6858,0	10733,0	5153,0	262,0	570,0	5458,0	211,0	552,0	2630,5	4792,0	6902,5	15944,5	10309,5	11755,5
LUMC#4	D11	3324,0	4824,0	79,0	1433,0	4545,0	736,5	458,0	161,0	21,0	71,0	432,0	760,0	6888,5	6468,0	15133,0	11135,0	12904,0
LUMC#5	E11	88,0	45,0	19,0	106,0	1520,0	27,5	133,0	27,0	21,0	46,0	123,0	1956,0	5856,0	5985,0	11467,0	3768,0	6206,0
LUMC#6	F11	434,0	157,0	54,0	107,0	3991,0	551,0	125,5	99,0	20,5	50,0	190,0	1219,0	5754,0	6687,0	10515,5	8653,0	9888,0
spiked 1500	H11	4196,0	484,0	1247,0	4482,0	8725,0	946,0	3541,0	4510,0	374,0	1617,0	9136,0	1439,0	1522,0	438,5	15439,0	2041,5	5029,0
spiked 500	G11	439,0	99,0	269,0	357,0	2029,0	65,5	650,0	2090,0	25,0	294,0	4342,0	205,0	250,0	32,0	4129,0	483,0	1432,5

[truncated: 10 more sheets: lab 2- manu III lot A, lab 2- manu IV lot A, lab 2- manu IV lot B, lab 2- manu IV lot C, lab 3- manu I lot A, lab 3- manu II lot A, lab3- manu III lot A, lab 3- manu III lot B, lab 3- manu III lot C, lab 3- manu IV lot A]
